# Supplementary material for: Cancer evaluation in dogs using cerumen as a source for volatile biomarker prospection
Source: Royal Society of Chemistry journal article supplement (doi:10.1039/d3mo00147d), 2023-09-08
Supplement: d3mo00147d1.pdf [file d3mo00147d1.pdf]

Electronic Supplementary Material for

**Cancer evaluation in dogs using cerumen as a source for volatile biomarkers prospection**

João Marcos G. Barbosa\*, Engy Shokry, Lurian C. David, Naiara Z. Pereira, Adriana R. da Silva, Vilma F.de Oliveira, Maria Clorinda S. Fioravanti, Paulo H. Jorge da Cunha, Anselmo E. de Oliveira, Nelson R. Antoniosi Filho\*

\*Corresponding author: [joamarcosquim.ufg@outlook.com](mailto:joamarcosquim.ufg@outlook.com) (J.M.G.B); [nelsonroberto@ufg.br](mailto:nelsonroberto@ufg.br) (N.R.A.F.)

This file includes:

Figures S1-S17

Tables S1-S4

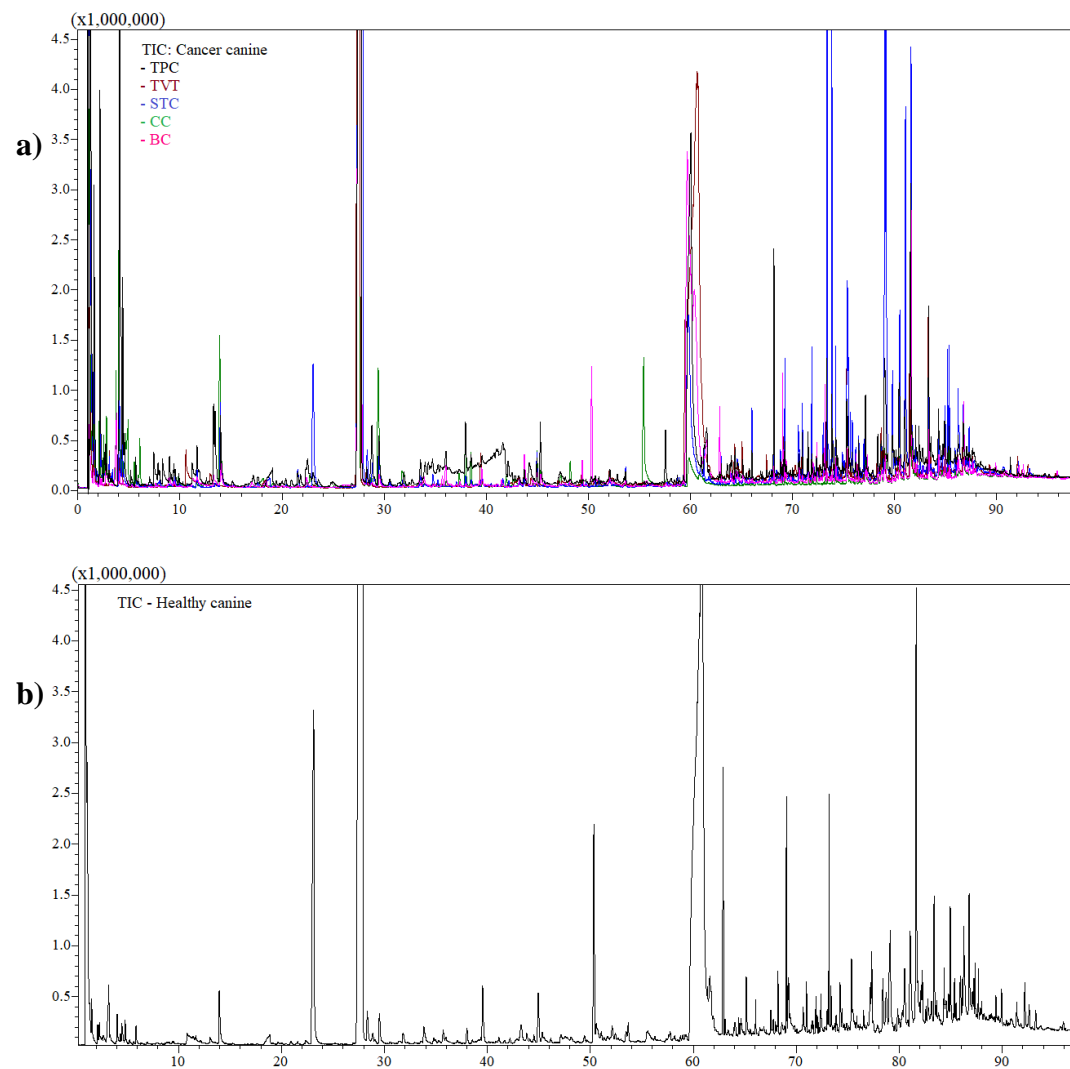

**Figure S1.** Total ion chromatograms (TICs) fingerprint of cerumen samples analysis from some examples of cancer dogs (a) and one example of healthy canines (b). TPC= Testicular & Prostate Cancer, TVT=Transmissible Venereal Tumor, STC=Soft Tissue Cancer, CC= Colorectal Cancer, BC=breast cancer.

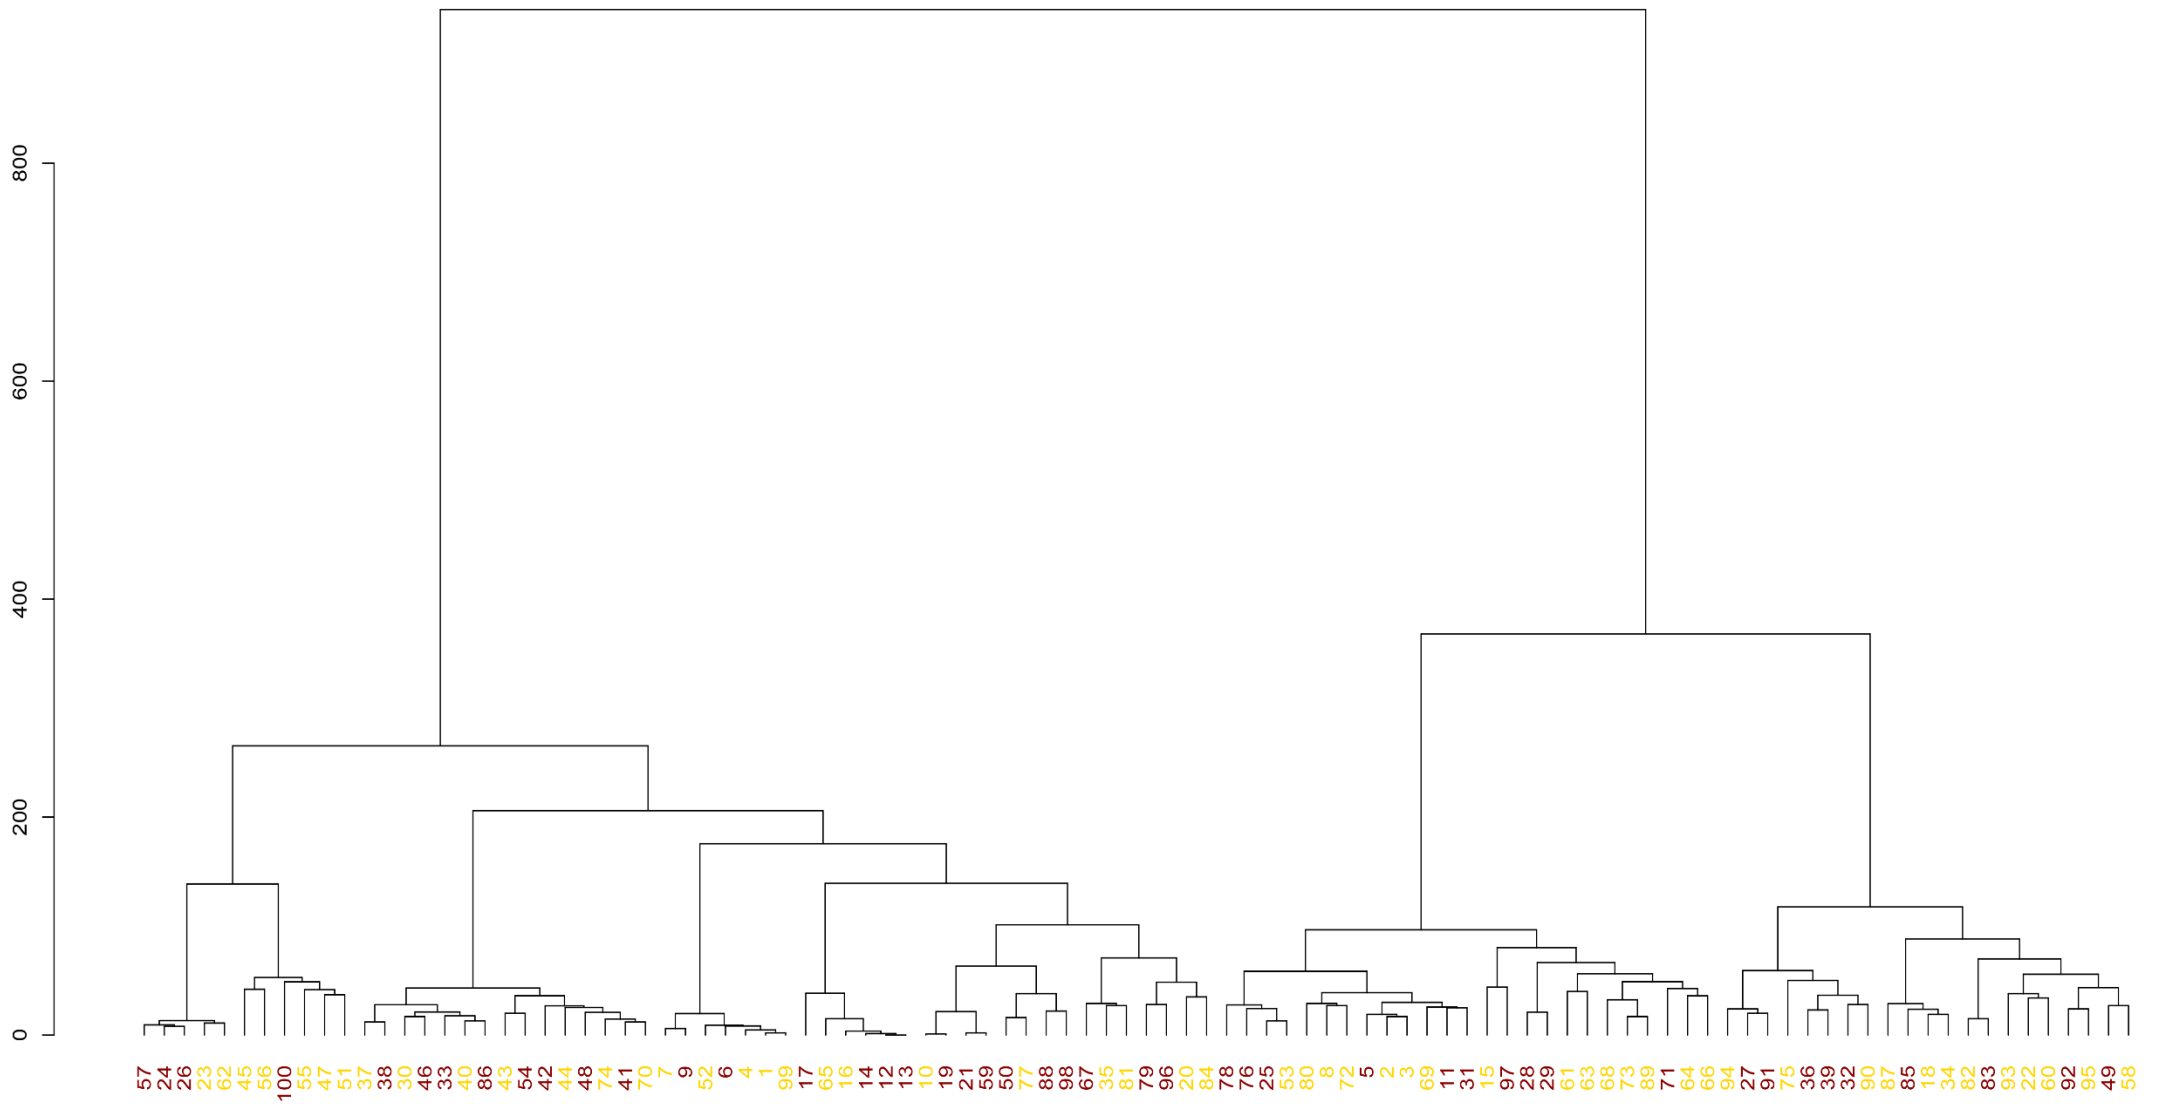

**Figure S2.** Hierarchical Cluster Analysis (HCA) using all the 128 Volatile Organic Metabolites (VOMs) annotated to evaluate the sex influence on sample discrimination. Cerumen samples: **Gold** = Female; **Dark red** = Male. Samples are enumerated by HS/GC-MS order of analysis.

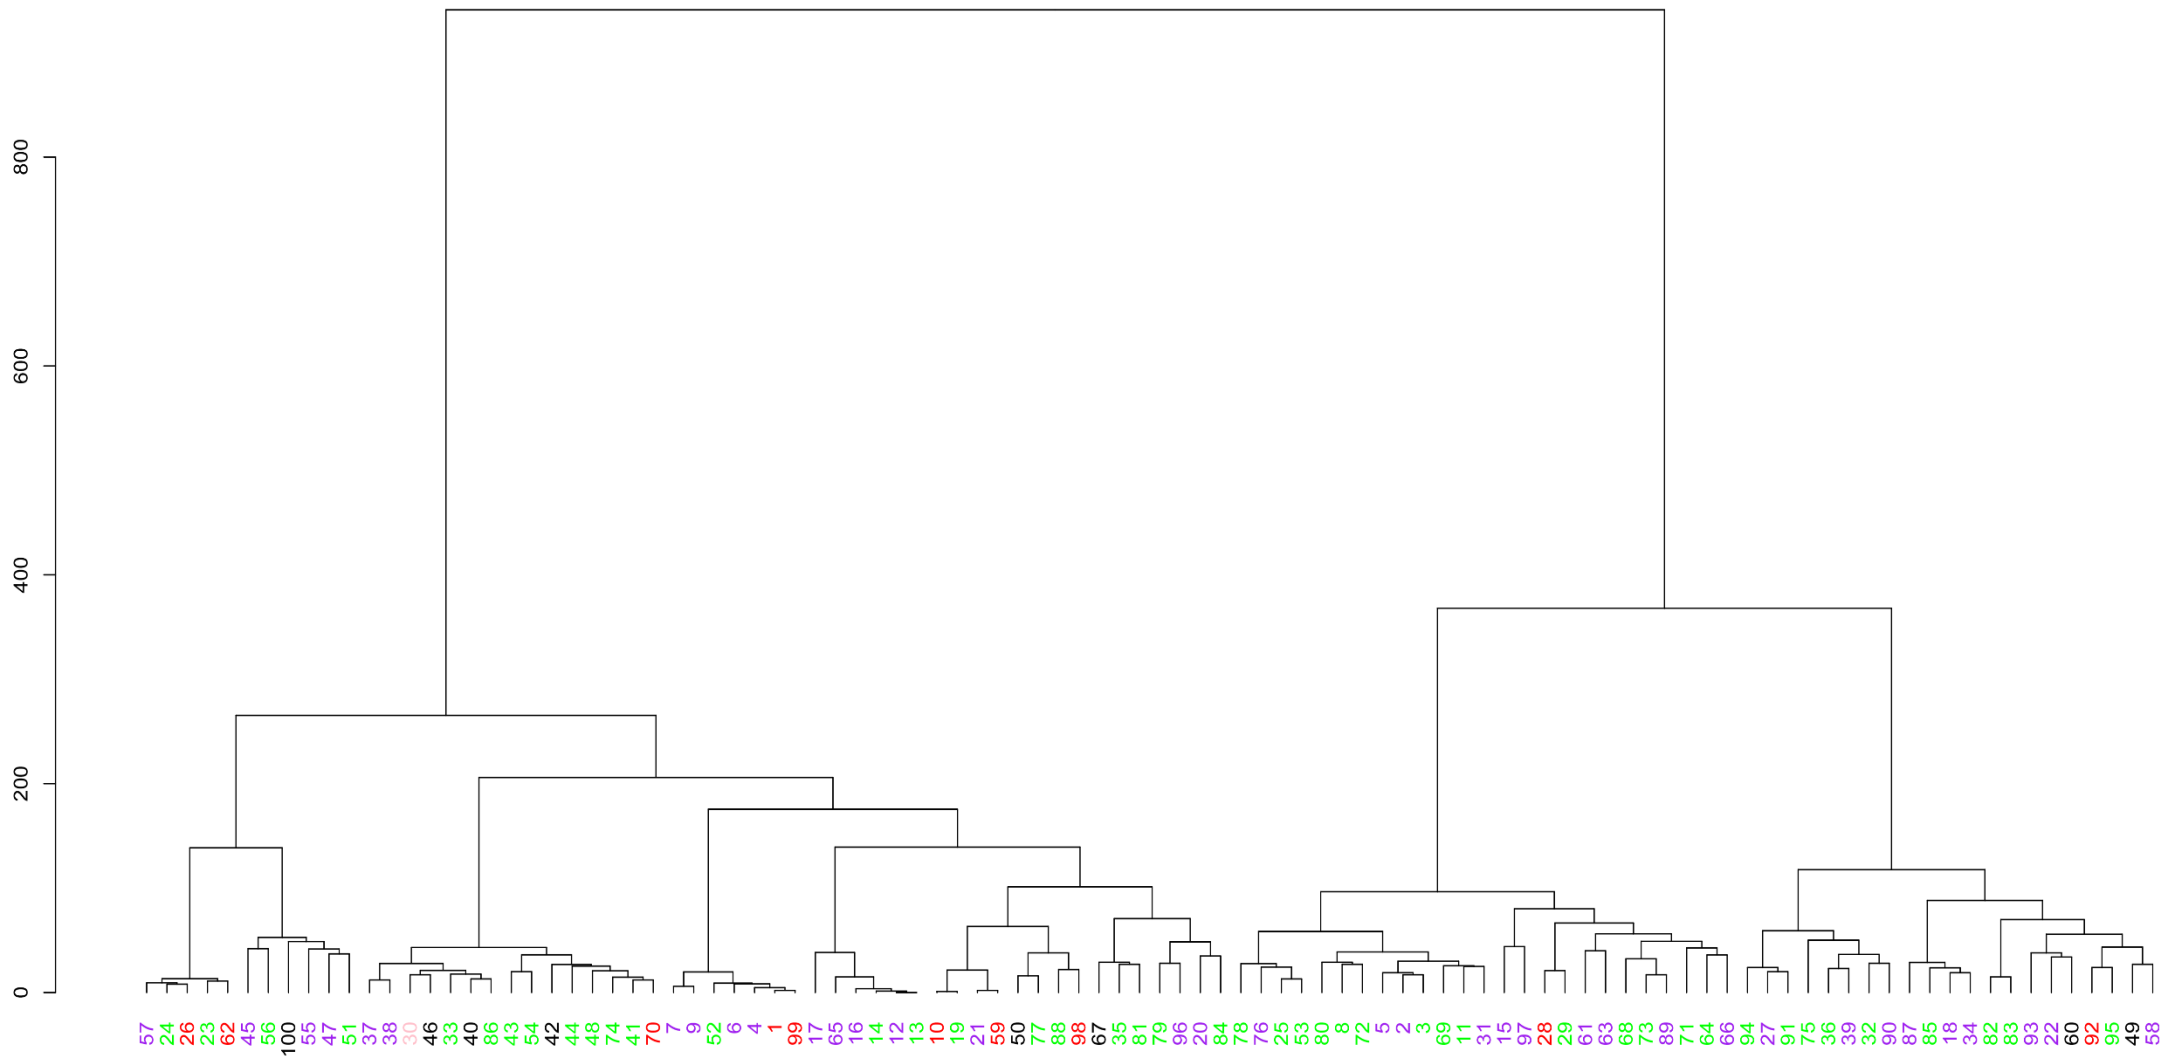

**Figure S3.** Hierarchical Cluster Analysis (HCA) using all the 128 Volatile Organic Metabolites (VOMs) annotated to evaluate the age bias on sample discrimination. Cerumen samples: **Red** = Adolescent (6–18 months) ; **Purple** = Adults (2–7 years); **Green** = Seniors (8–14 years); **Pink** = Geriatrics (>14 years); **Black** = Age Not available. Samples are enumerated by HS/GC-MS order of analysis.

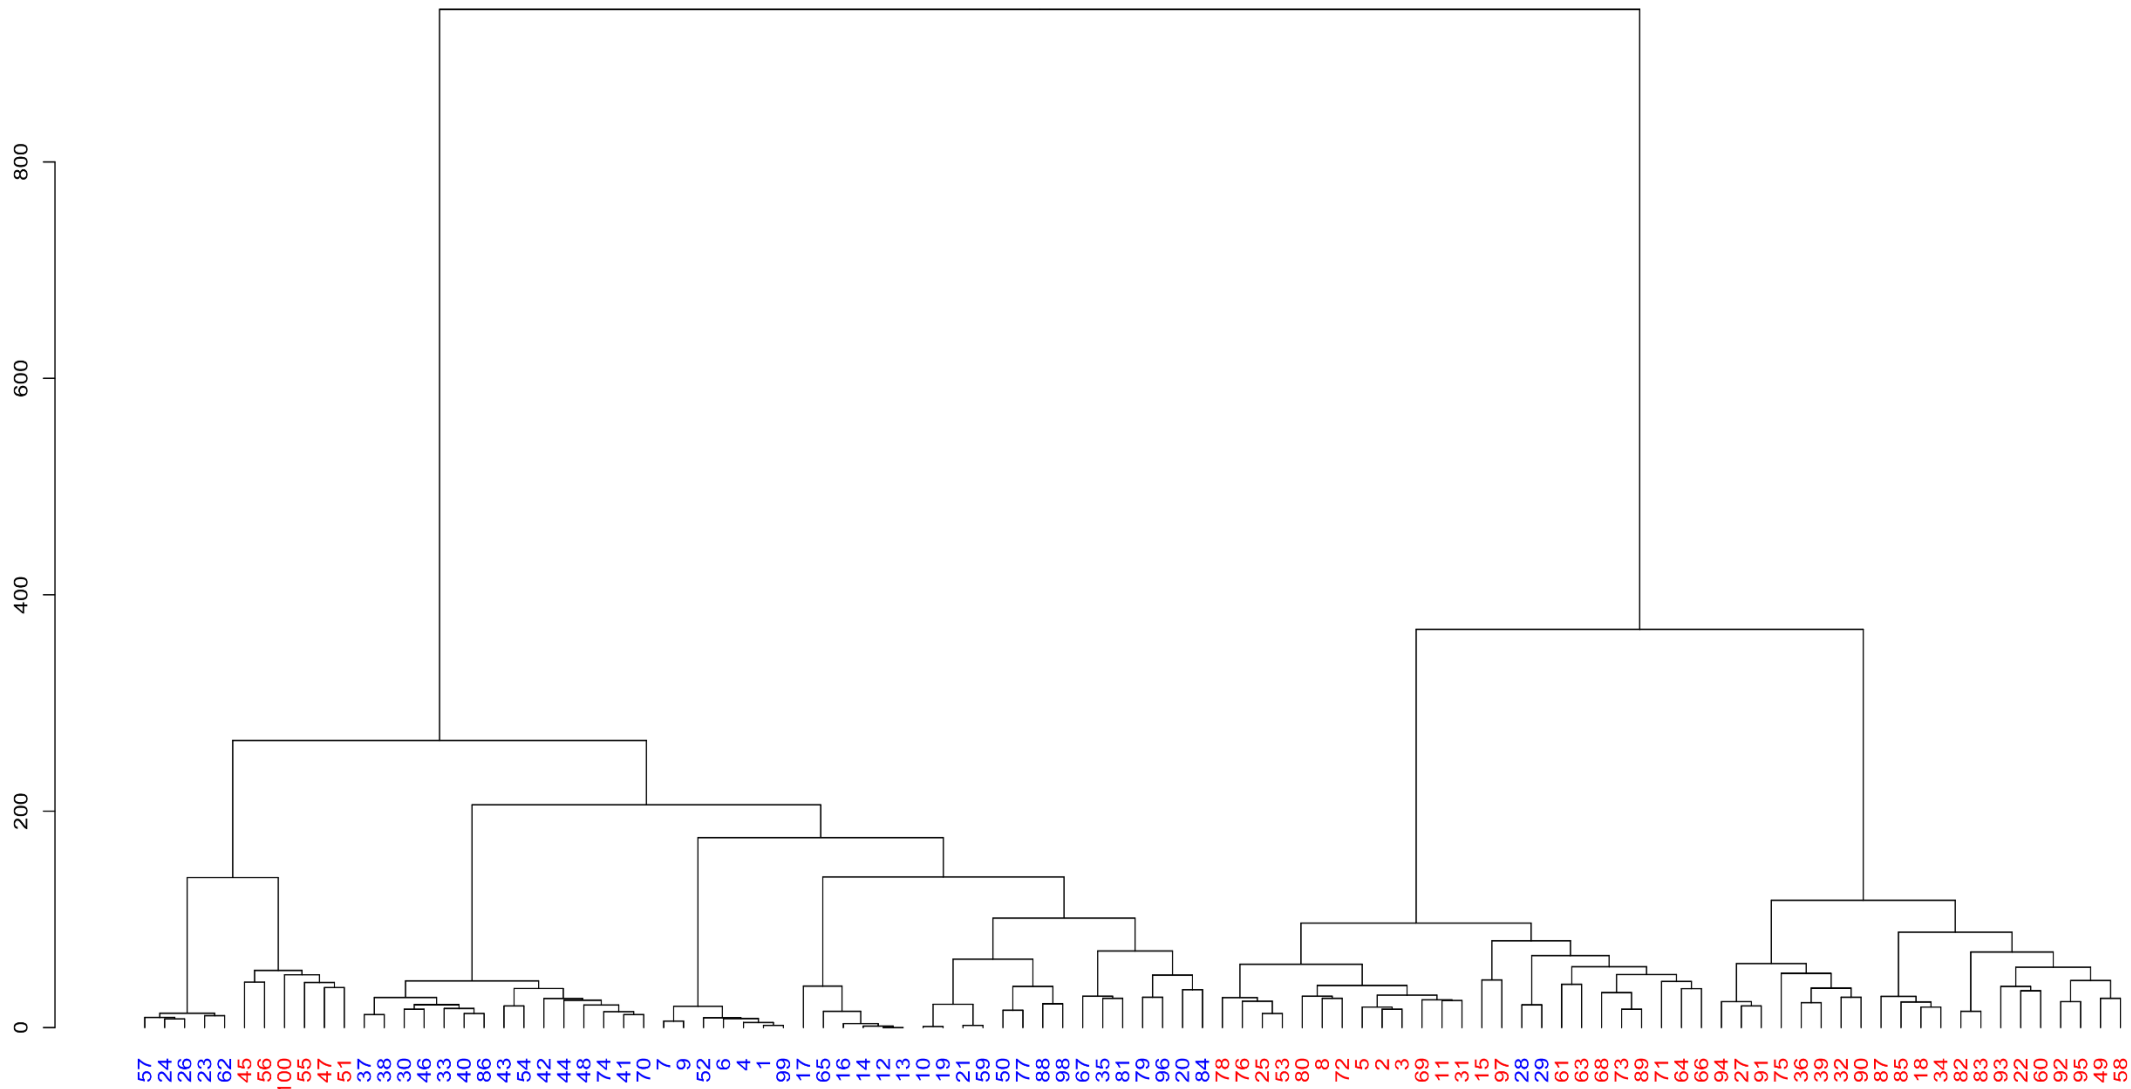

**Figure S4.** Hierarchical Cluster Analysis (HCA) using all the 128 Volatile Organic Metabolites (VOMs) annotated to evaluate the cancer influence on sample discrimination. Cerumen samples: **Red** = Cancer dogs, **Blue** = Healthy dogs. Samples are enumerated by HS/GC-MS order of analysis.

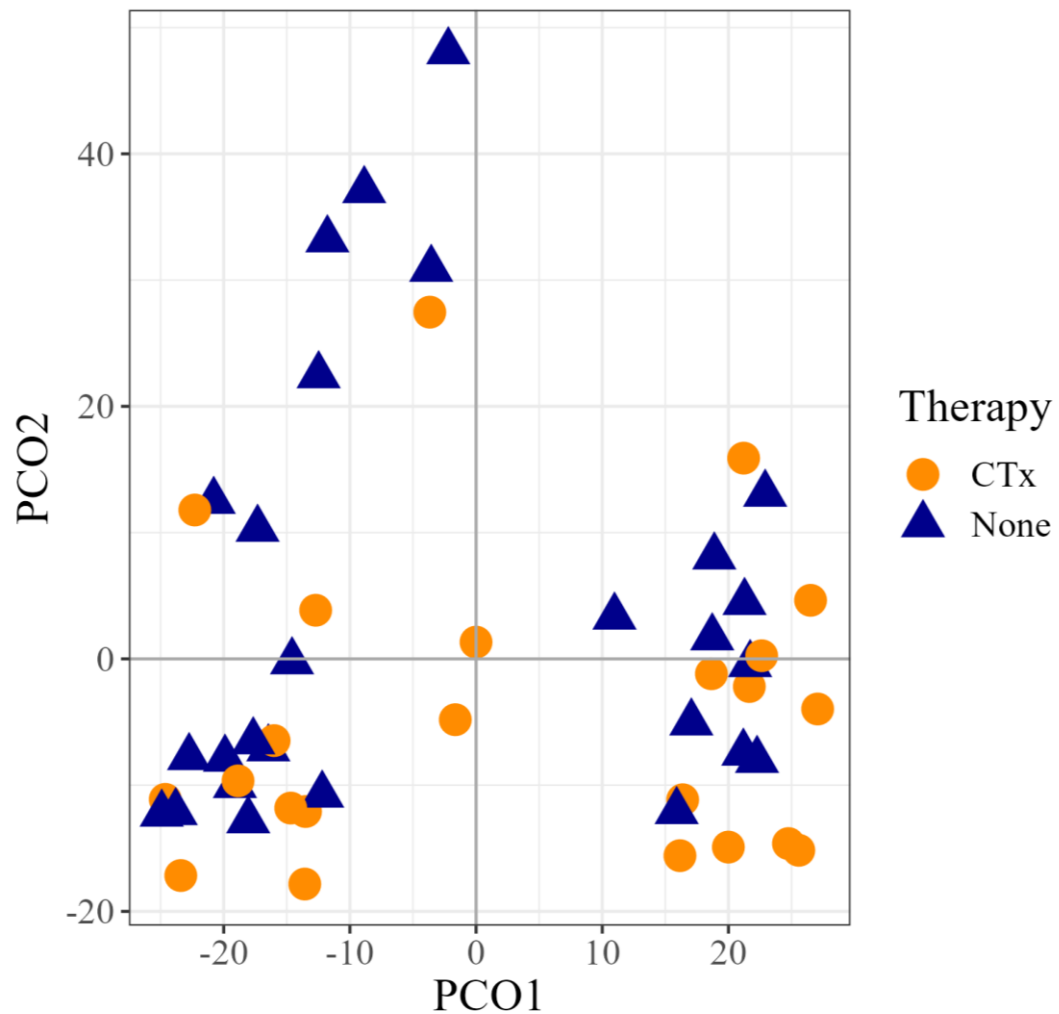

**Figure S5.** Principal coordinate analysis (PCoA) visualization of all the 128 Volatile Organic Metabolites (VOMs) annotated to evaluate the chemotherapy treatment influence in cancer sample discrimination. Cerumen samples: **Orange dots** = Cancer dogs under chemotherapy therapy (CTx), **Dark blue triangles** = Cancer dogs without chemotherapy treatment (None).

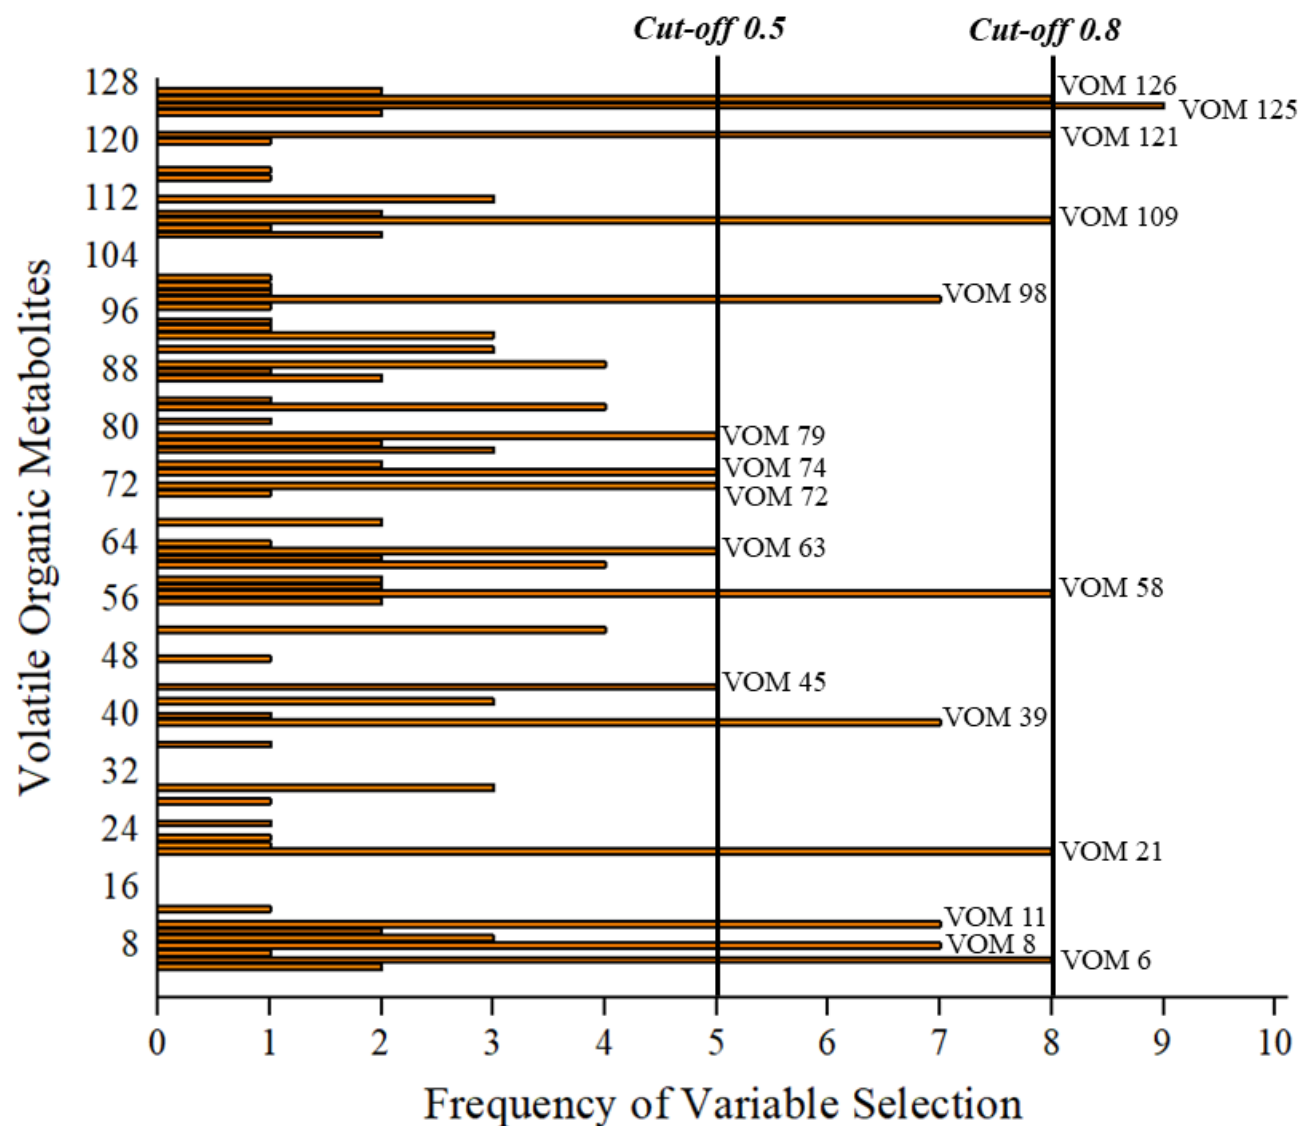

**Figure S6.** Variables/VOMs selected by GA-PLS to build the candidate panels of biomarkers. Chromosomes XI and XII hold the variables chosen at least 5 out of 10 (*cut-off* 0.5) and 8 out of 10 (*cut-off* 0.8) times during the ten random GA models.

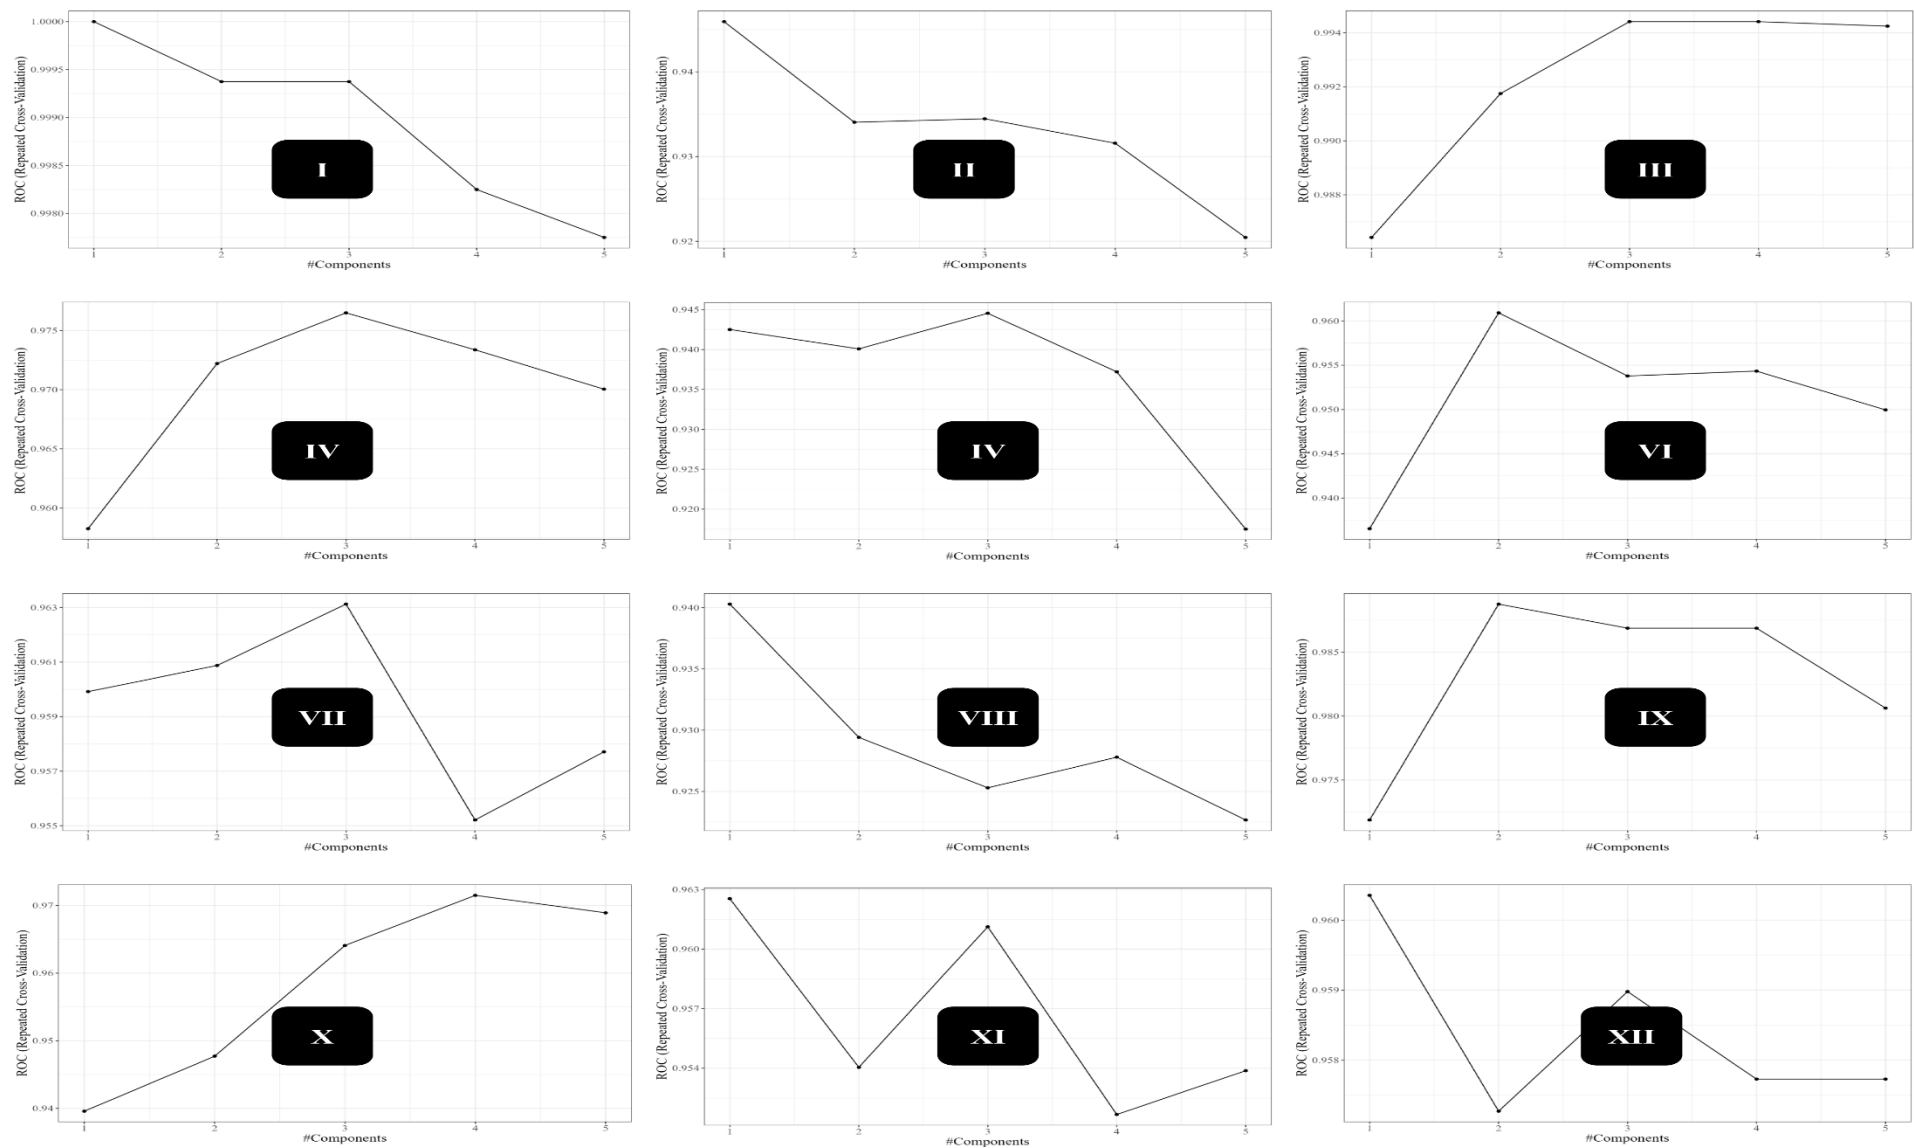

**Figure S7.** ROC results for the repeated k-fold cross-validation (k=10, repeats=10) for the cerumenogram model in dogs. The numbers I to XII represent the GA-PLS chromosomes containing the candidate panel biomarkers, as described in Table S3. Chromosome 1 represents the best ROC value (1.000) using 18 VOMs and 1 PLS component.



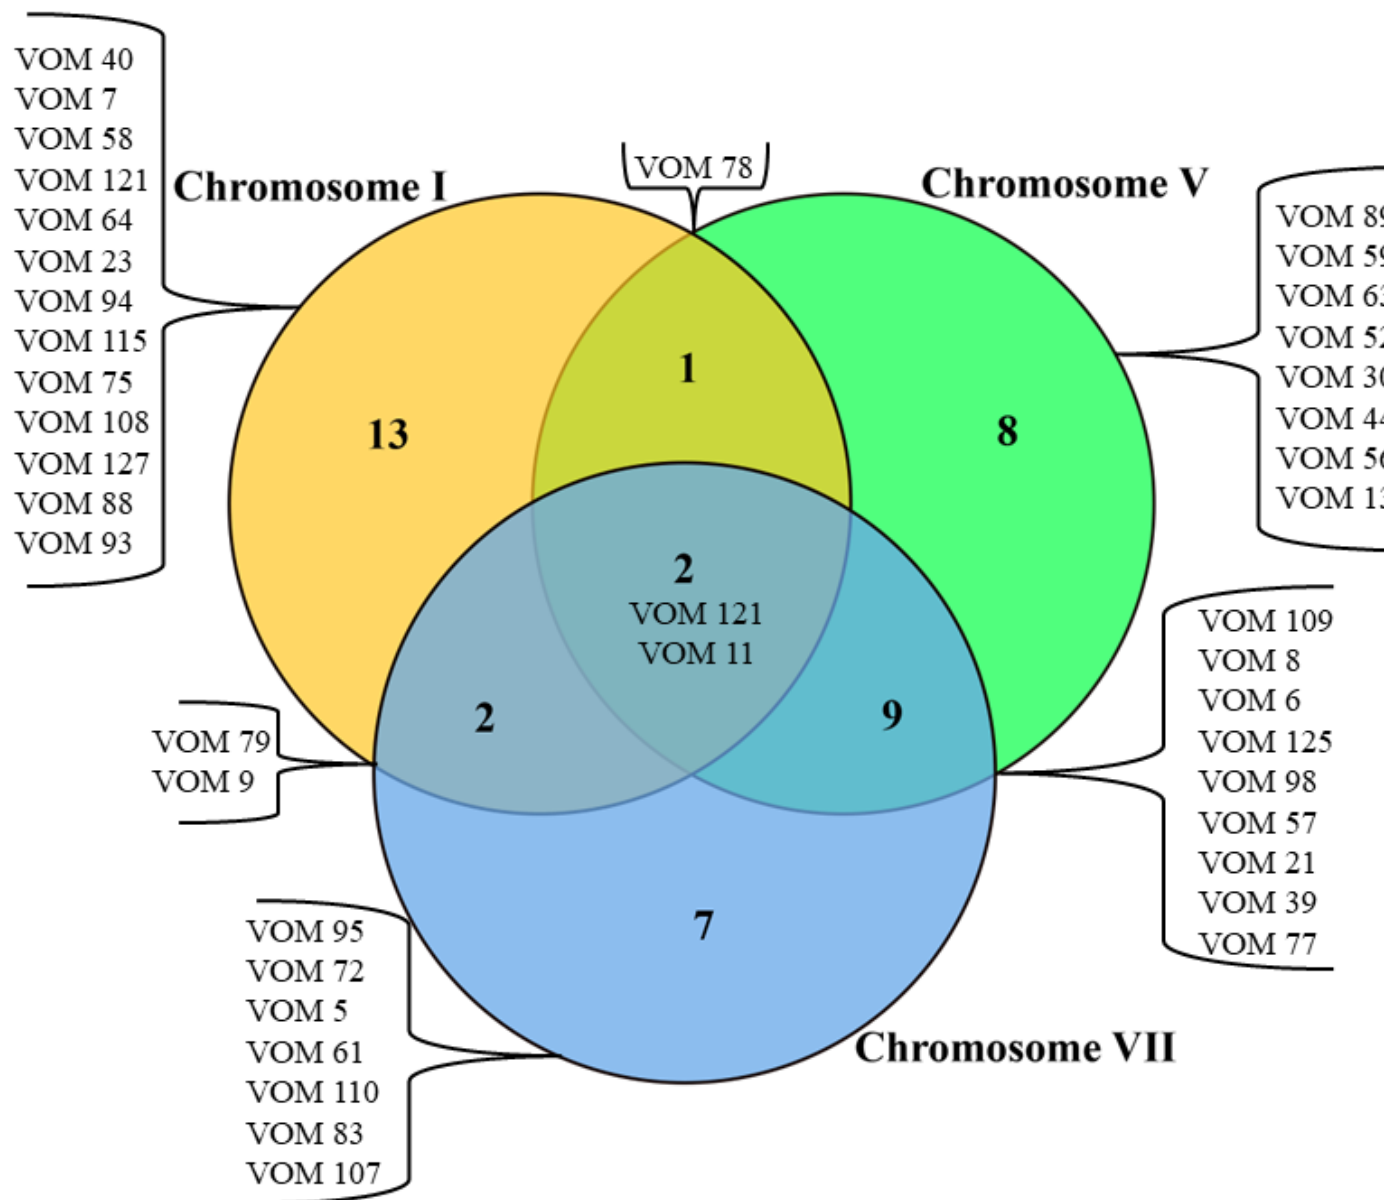

**Figure S8.** Venn diagram of the three best GA-PLS chromosomes (I, V, and VII Table S3) showing the shared VOMs enumerated by their retention time (Table S2).

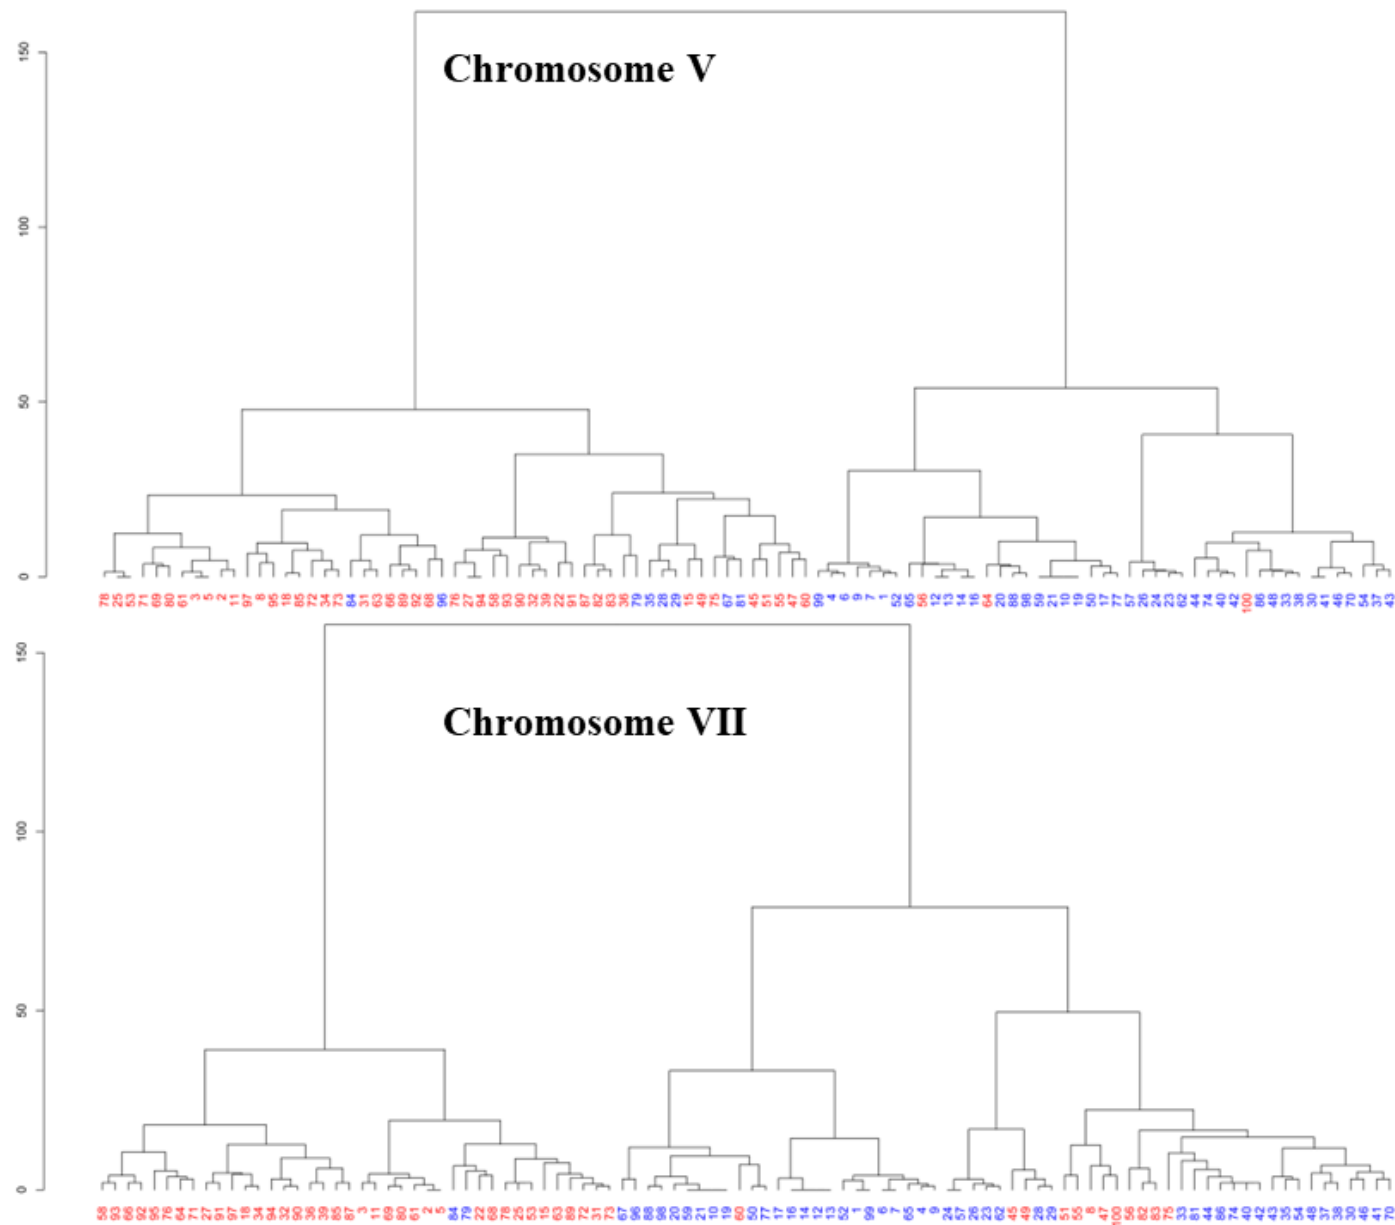

**Figure S9.** Dendrogram of the 100 cerumen samples using the VOMs in chromosomes V and VII pointed out as a panel of potential cancer biomarkers in canines. The candidate biomarkers did not successfully discriminate between the control (Blue) and cancer (red) samples.

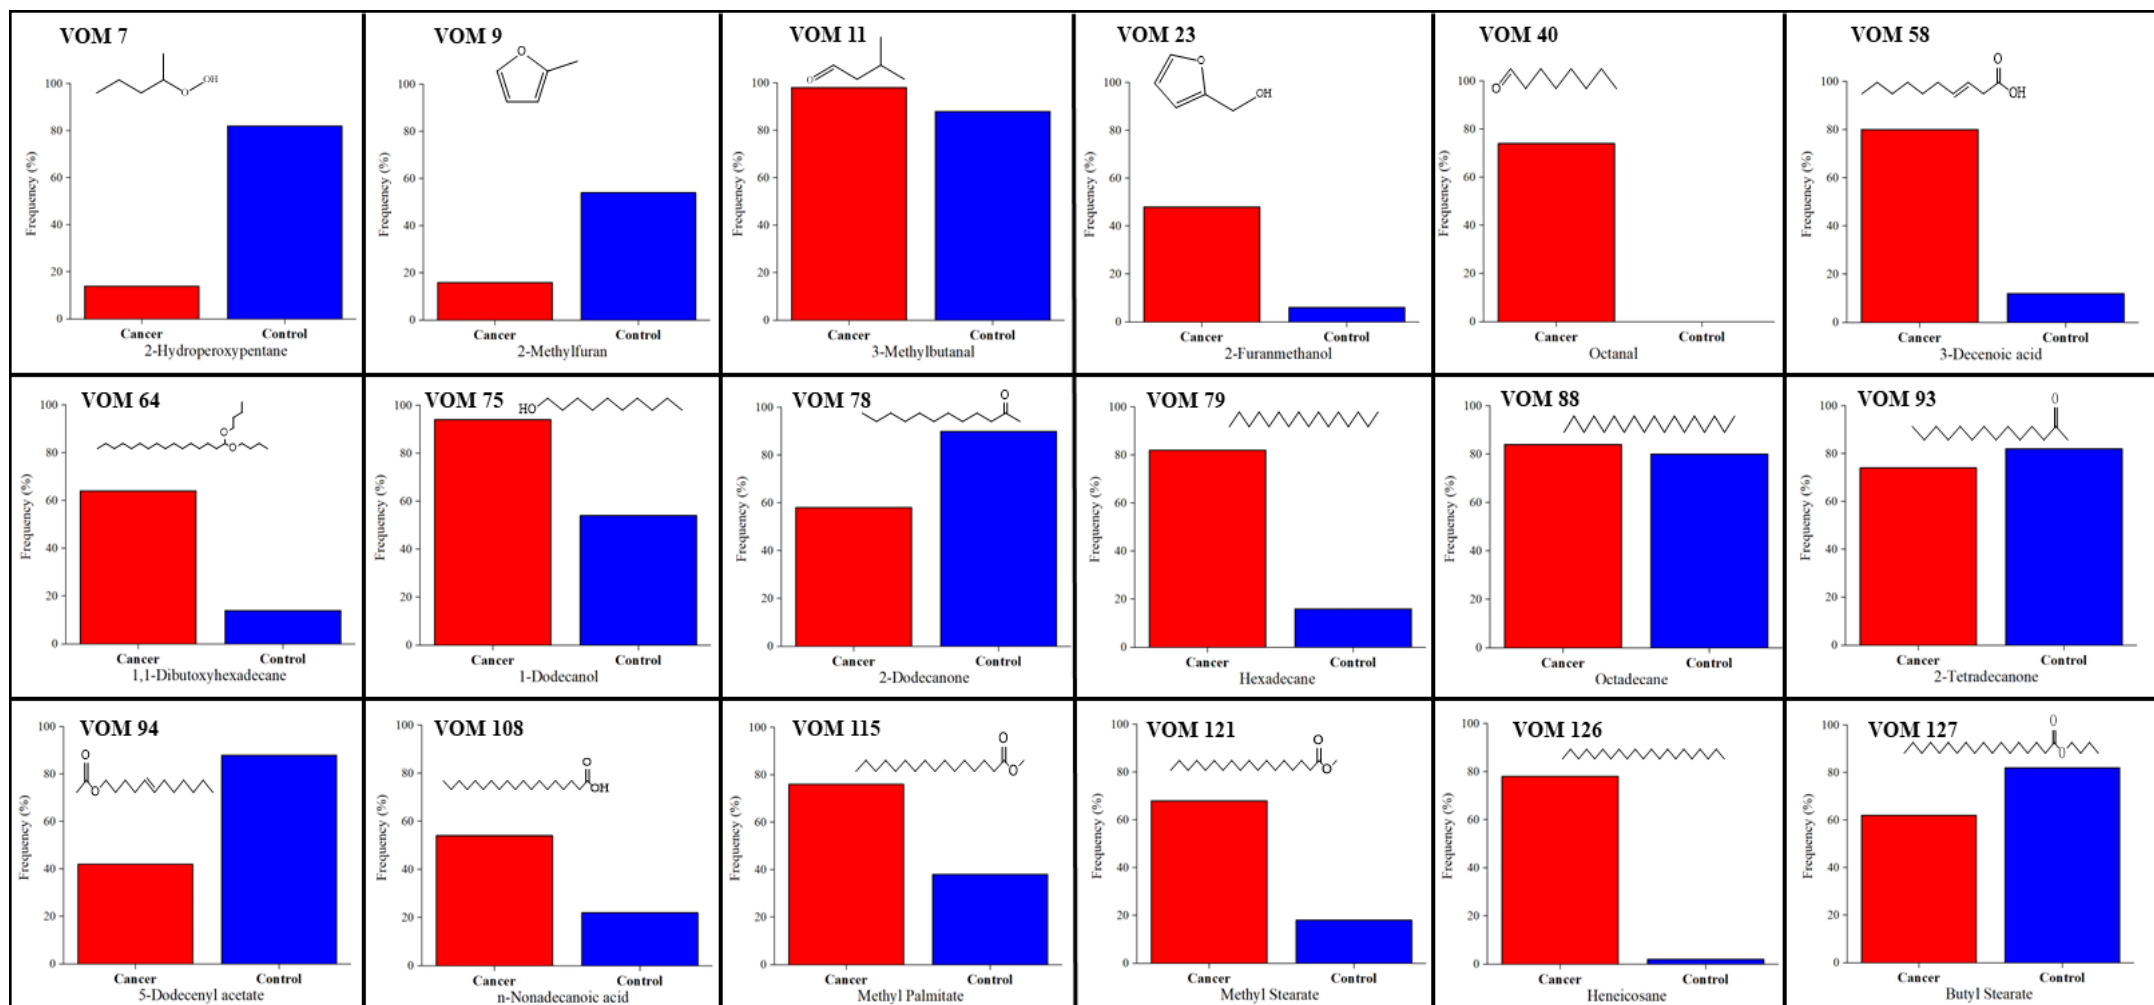

**Figure S10.** The panel of the potential cancer biomarkers detected in earwax samples of dogs. The metabolite occurrence (frequency, %) in a group (cancer and control) represents the sum of the presence of each volatile across the samples analyzed by HS/GC-MS. The VOMs are enumerated under their relative retention time (Table S2).

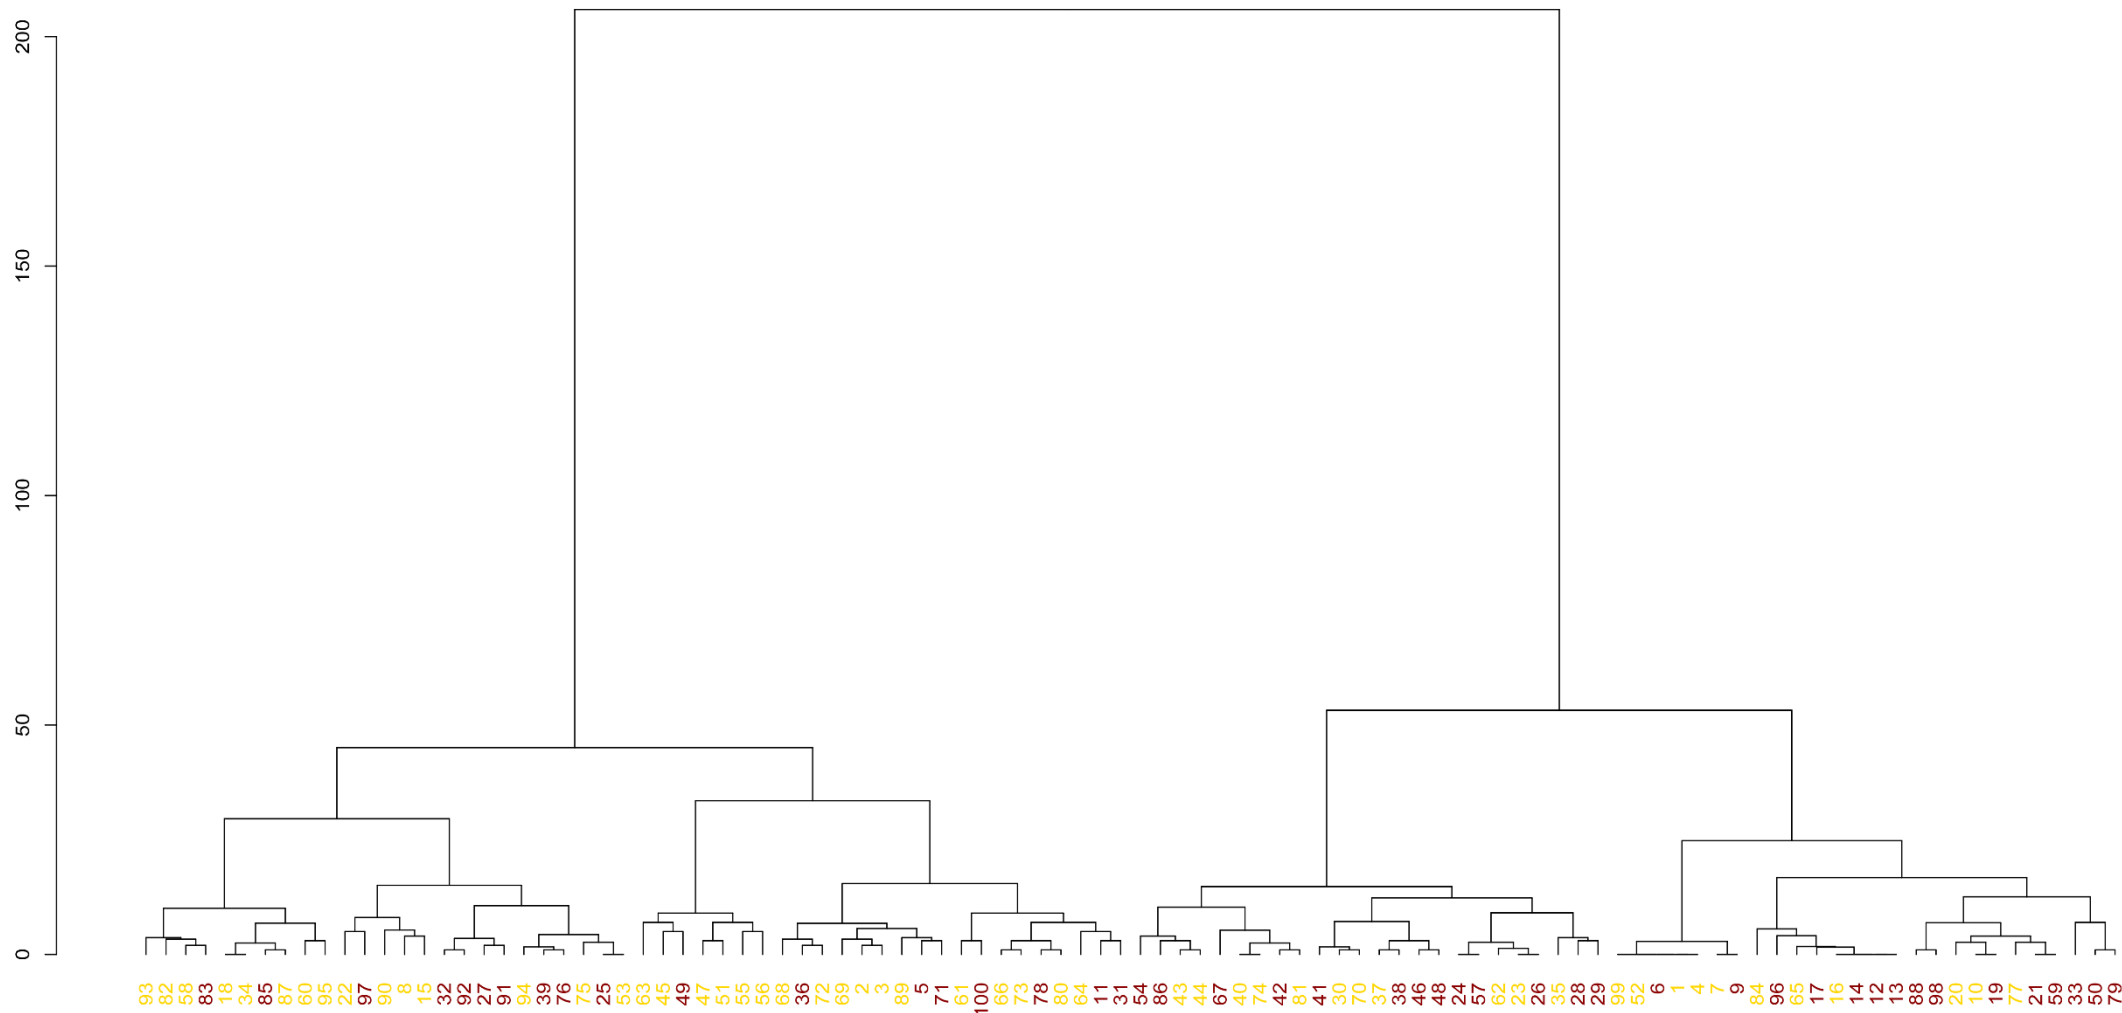

**Figure S11.** Hierarchical Cluster Analysis (HCA) using the 18 Volatile Organic Metabolites (VOMs) selected as potential cancer biomarkers in canines to evaluate the sex influence in the multivariate model. Cerumen samples: **Gold** = Female; **Dark red** = Male. Samples are enumerated by HS/GC-MS order of analysis.

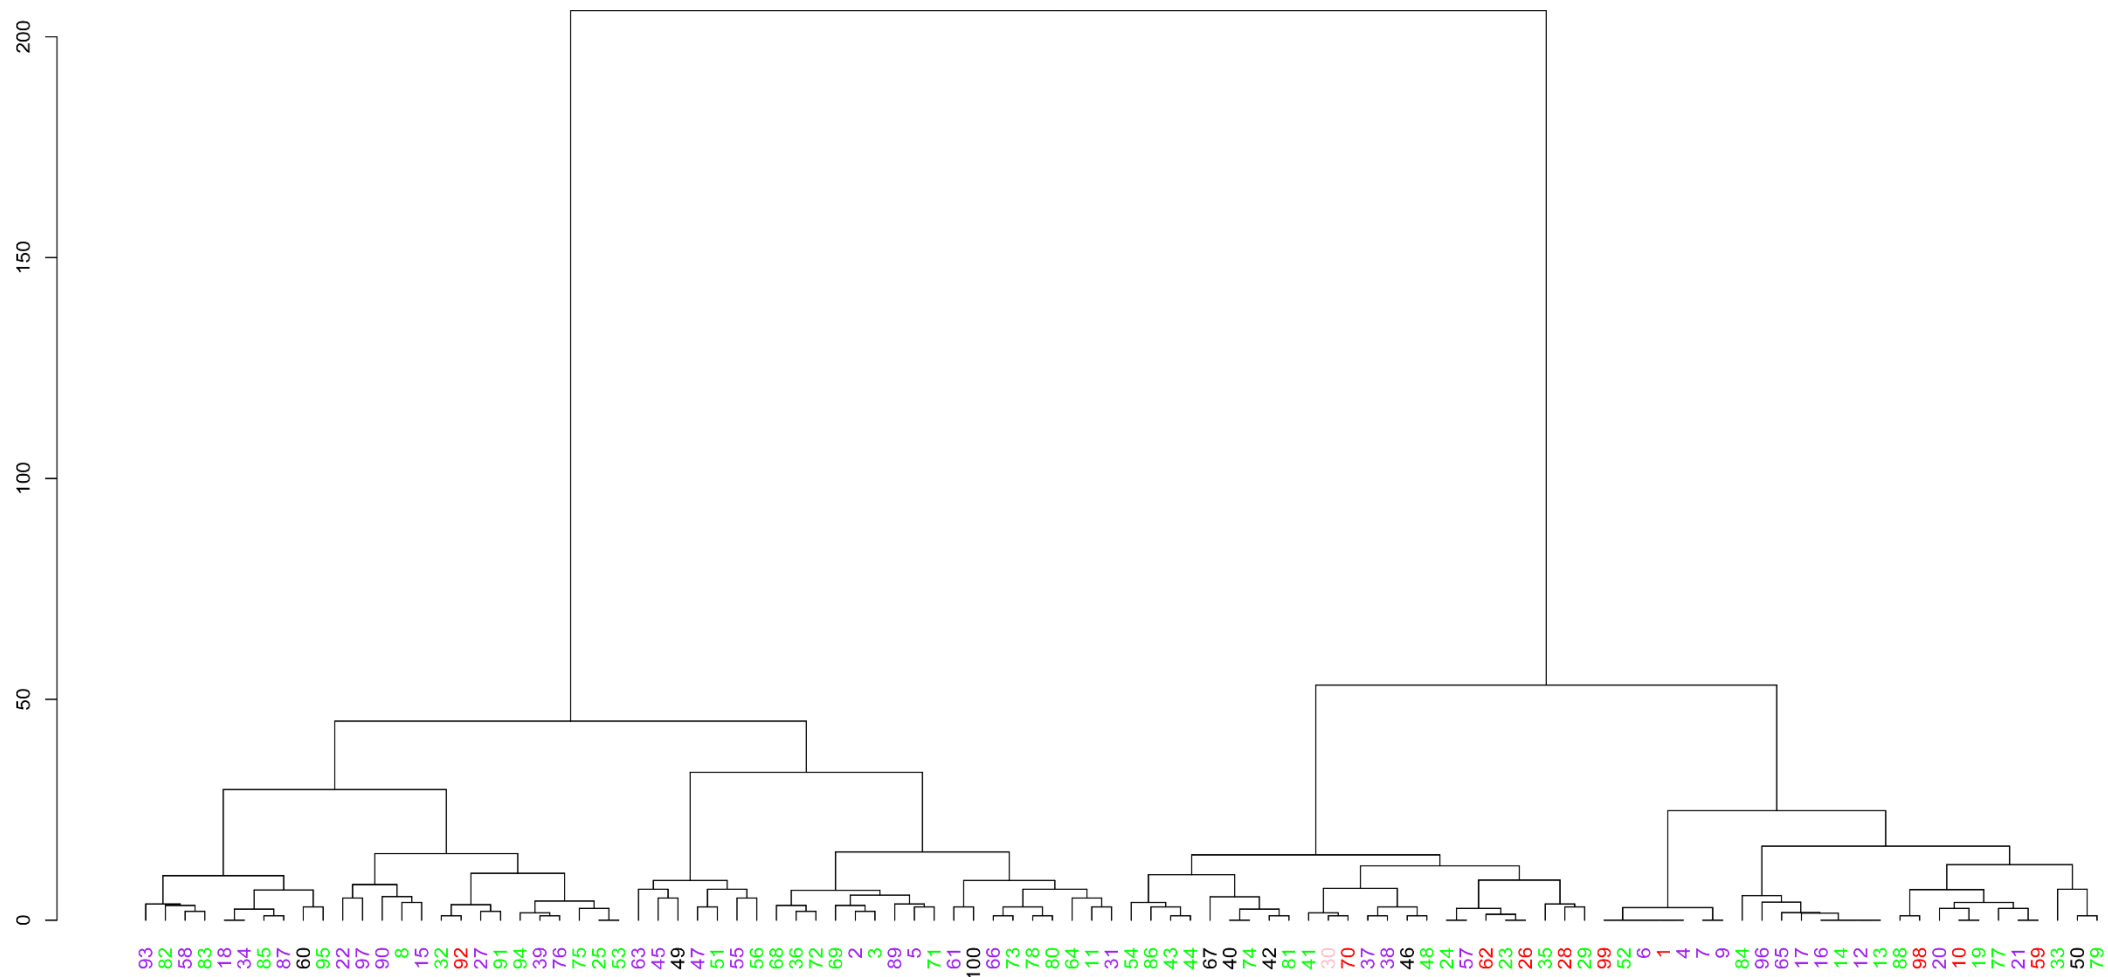

**Figure S12.** Hierarchical Cluster Analysis (HCA) using the 18 Volatile Organic Metabolites (VOMs) selected as potential cancer biomarkers in canines to evaluate the age bias in the multivariate model. Cerumen samples: **Red** = Adolescent (6–18 months) ; **Purple** = Adults (2–7 years); **Green** = Seniors (8–14 years); **Pink** = Geriatrics (>14 years); **Black** = Age not available. Samples are enumerated by HS/GC-MS order of analysis.

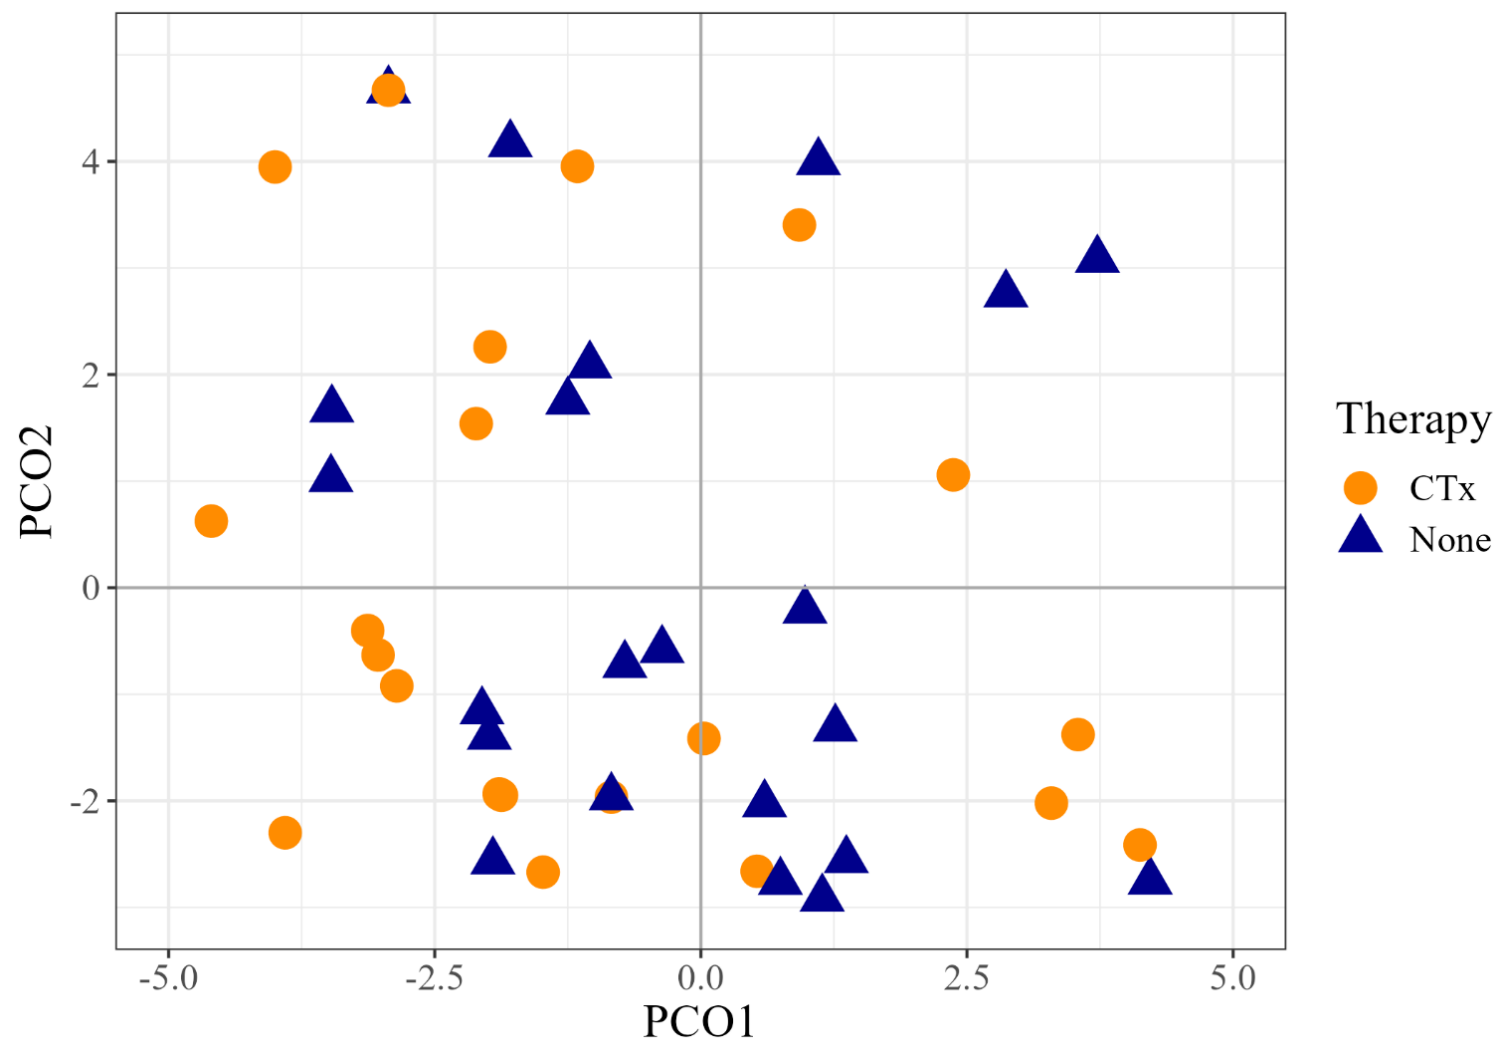

**Figure S13.** Principal coordinate analysis (PCoA) visualization to evaluate the chemotherapy treatment influence in cancer sample discrimination using the 18 Volatile Organic Metabolites (VOMs) selected as potential cancer biomarkers. Cerumen samples: Orange dots = Cancer dogs under chemotherapy therapy (CTx), Dark blue triangles = Cancer dogs with no chemotherapy treatment (None).

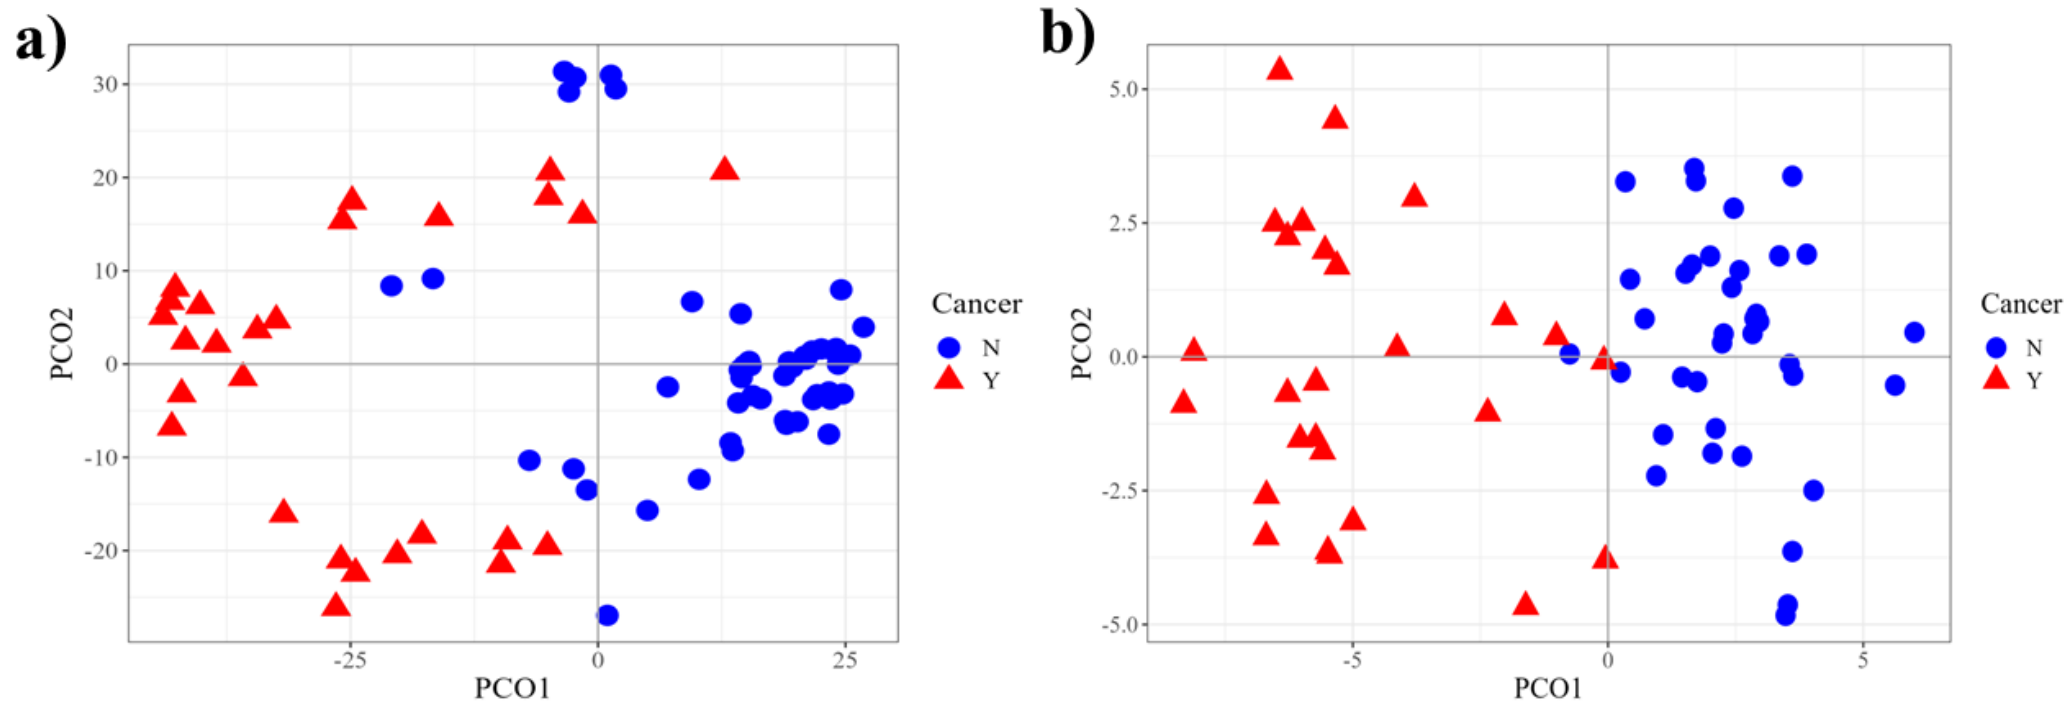

**Figure S14.** A discriminant trend showed in Principal coordinate analysis (PCoA) between the cerumen samples of the **control** and **cancer** group (without chemotherapy) using all the **a)** 128 Volatile Organic Metabolites (VOMs) annotated by HS/GC-MS. The trend is improved using the **b)** 18 VOMs selected as potential cancer biomarkers.

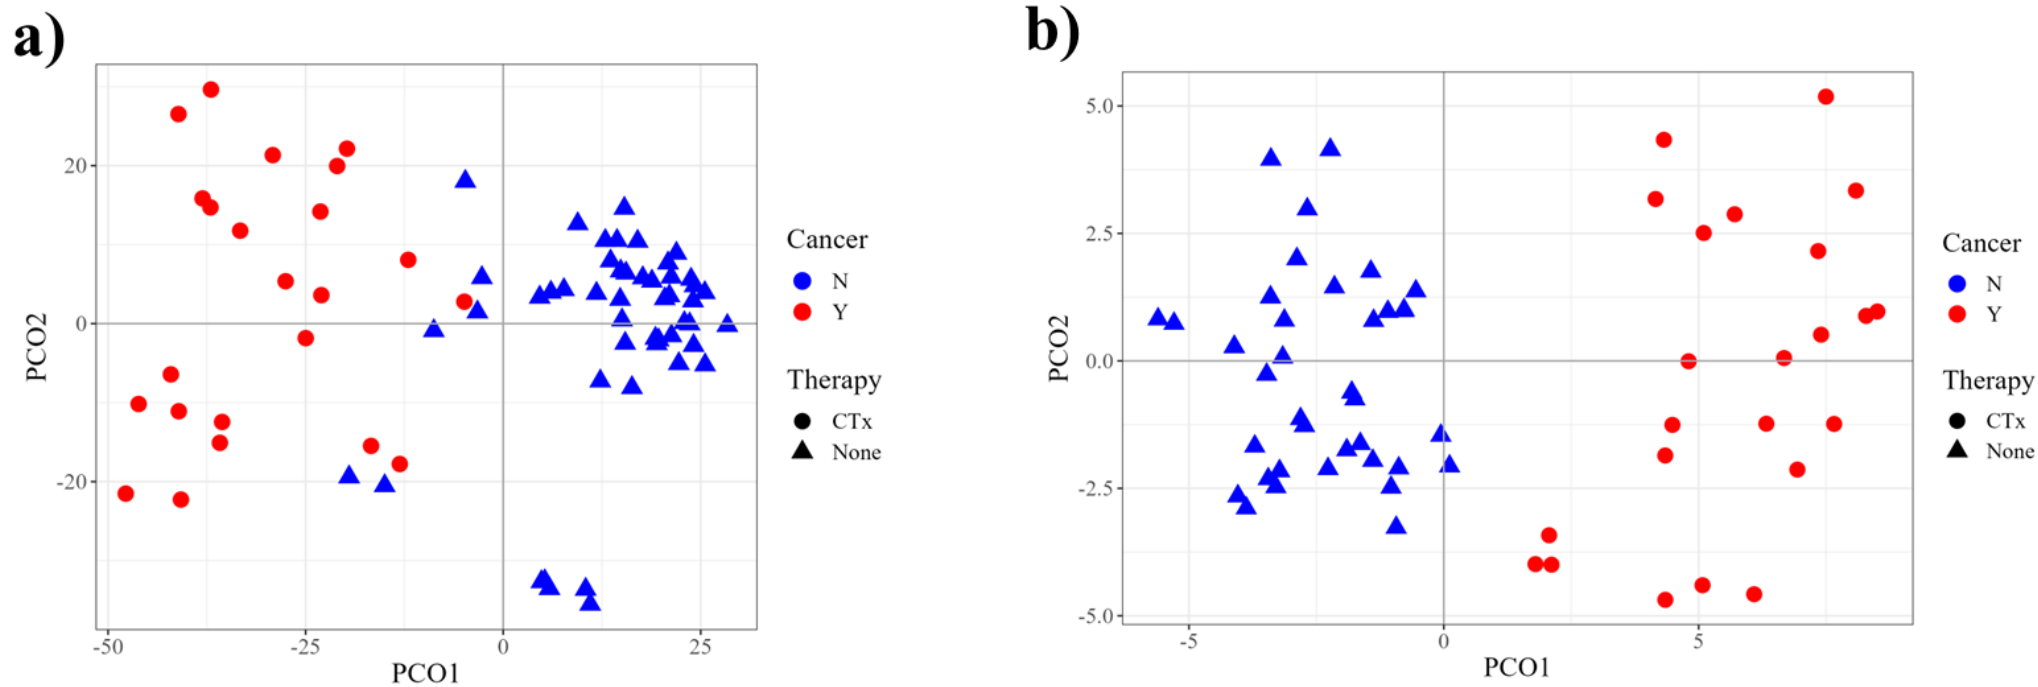

**Figure S15.** A discriminant trend showed in Principal coordinate analysis (PCoA) between the cerumen samples of the **control** and **cancer** group (with only cancer samples under chemotherapy - CTx) using all the **a)** 128 Volatile Organic Metabolites (VOMs) annotated by HS/GC-MS. The trend is improved using the **b)** 18 VOMs selected as potential cancer biomarkers.



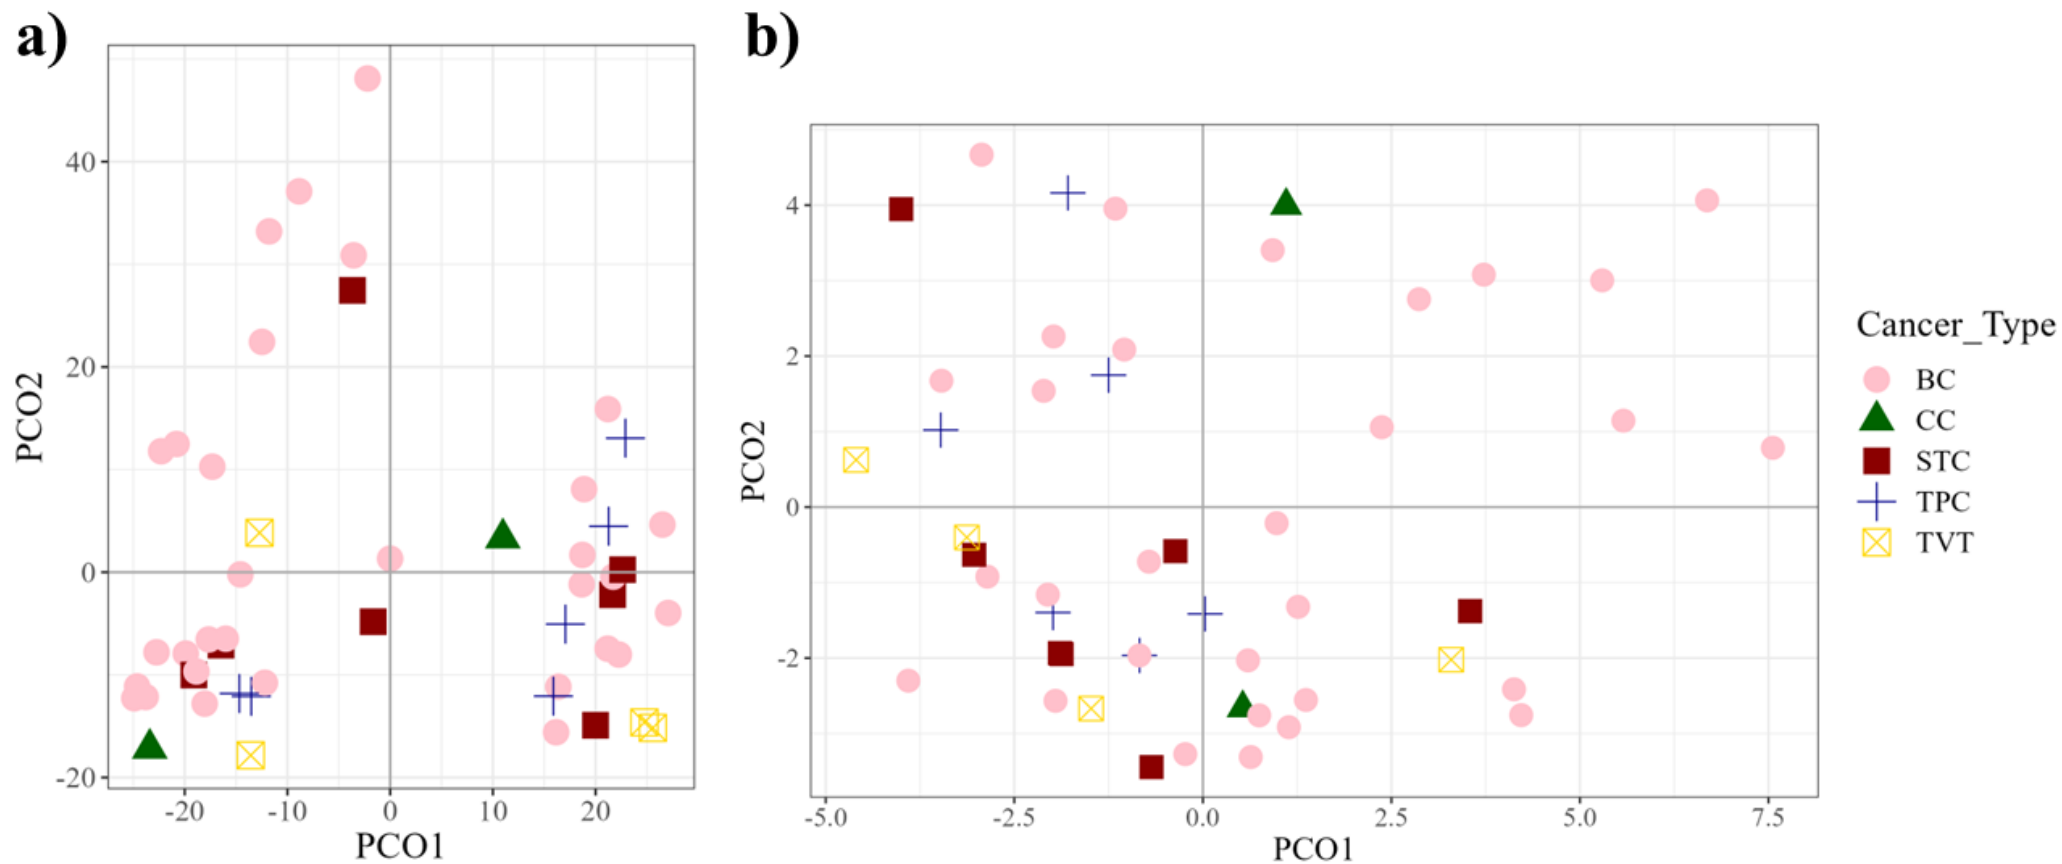

**Figure S16.** Principal coordinate analysis (PCoA) visualization aiming to evaluate the cancer type influence in cancer sample discrimination using the **a)** 128 Volatile Organic Metabolites (VOMs) annotated by HS/GC-MS and using the **b)** 18 VOMs selected as potential cancer biomarkers. BC = Breast Cancer; CC = Colorectal Cancer; STC = Soft tissue cancer; TPC = Testicular & prostate cancer; TVT = Transmissible venereal tumor.

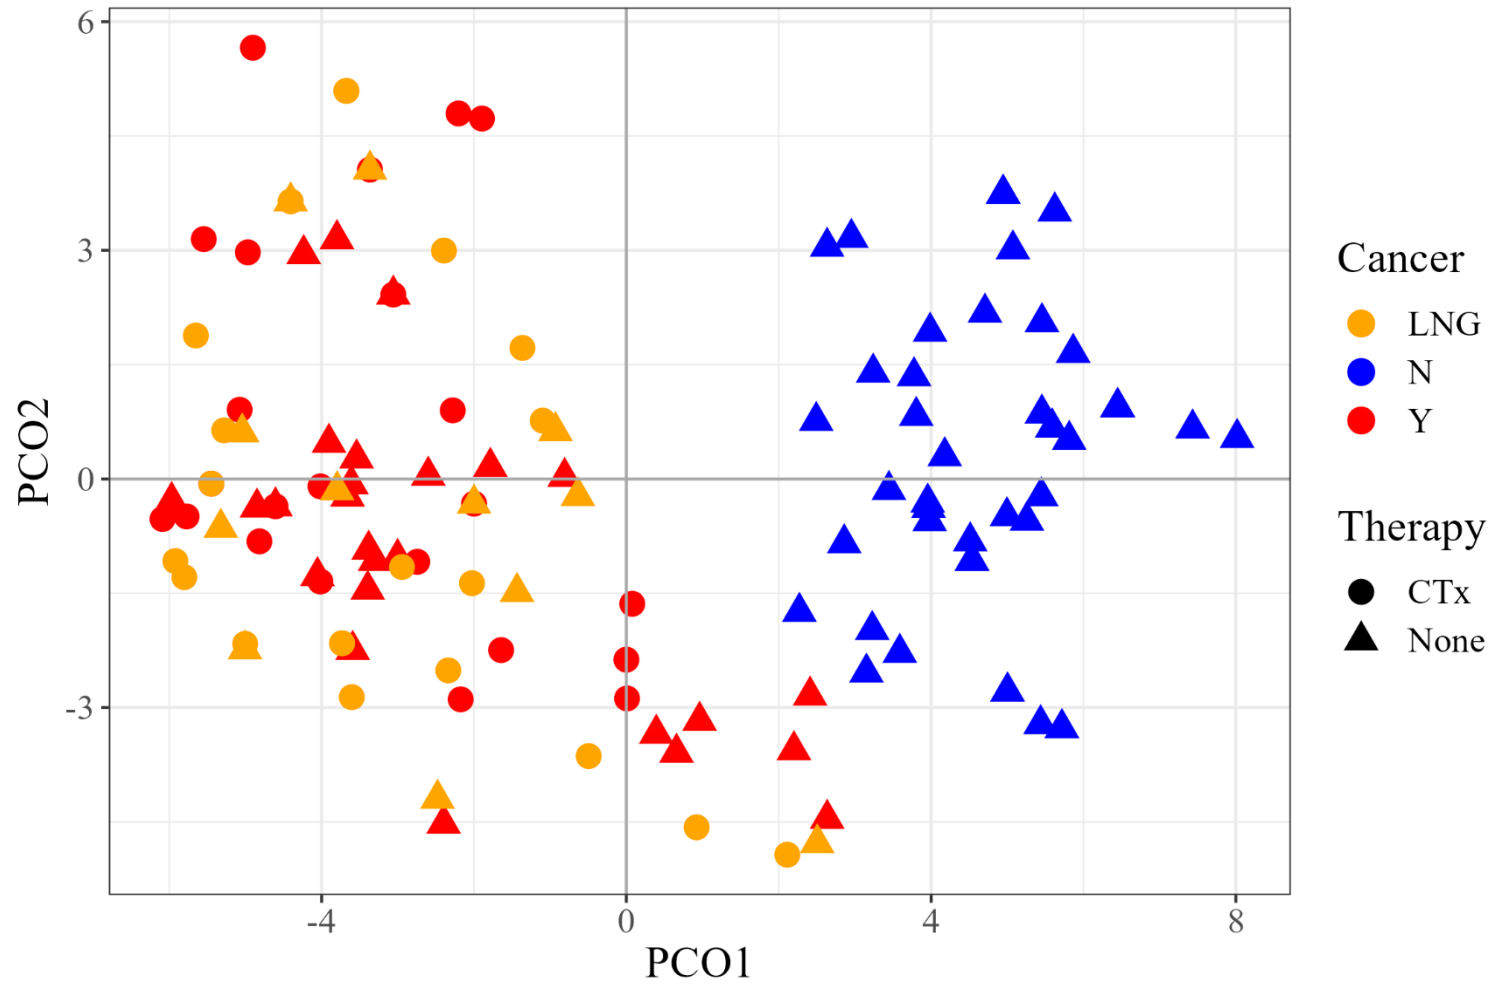

**Figure S17.** Principal coordinate analysis (PCoA) visualization of the 100 samples in the cerumenogram model (18 discriminant healthy/cancer VOMs) with the addition of the 33 cancer samples collected longitudinally (LNG – orange).

**Table S1.** Detailed characteristics of the dog cohort include breed, age, sex, and tumor type.

| <b>Characteristics</b>           | <b>Healthy (Non-cancer)</b> | <b>Breast cancer (BC)</b> | <b>Soft tissue cancer (STC)</b> | <b>Transmissible venereal tumor (TVT)</b> | <b>Testicular &amp; prostate cancer (TPC)</b> | <b>Colorectal cancer (CC)</b> |
|----------------------------------|-----------------------------|---------------------------|---------------------------------|-------------------------------------------|-----------------------------------------------|-------------------------------|
| <b>Number of subjects, n (%)</b> | 50 (100.0)                  | 31 (100.0)                | 7 (100.0)                       | 4 (100.0)                                 | 6 (100.0)                                     | 2 (100.0)                     |
| <b>Age range, n (%)</b>          |                             |                           |                                 |                                           |                                               |                               |
| Adolescents (6–18 months)        | 9 (18.0)                    | 0 (0)                     | 0 (0)                           | 0 (0)                                     | 1 (16.7)                                      | 0 (0)                         |
| Adults (2–7 years)               | 14 (28.0)                   | 16 (51.6)                 | 3 (42.9)                        | 2 (50.0)                                  | 0 (0)                                         | 1 (50.0)                      |
| Seniors (8–14 years)             | 21 (42.0)                   | 15 (48.4)                 | 2 (28.6)                        | 2 (50.0)                                  | 5 (83.3)                                      | 0 (0)                         |
| Geriatrics (>14 years)           | 1 (2.0)                     | 0 (0)                     | 0 (0)                           | 0 (0)                                     | 0 (0)                                         | 0 (0)                         |
| Not available (NA)               | 5 (10.0)                    | 0 (0)                     | 2 (28.6)                        | 0 (0)                                     | 0 (0)                                         | 1 (50.0)                      |
| <b>Sex, n (%)</b>                |                             |                           |                                 |                                           |                                               |                               |
| Males                            | 28 (56.0)                   | 0 (0)                     | 3 (42.9)                        | 4 (100.0)                                 | 6 (100.0)                                     | 2 (100.0)                     |
| Females                          | 22 (44.0)                   | 31 (100.0)                | 4 (57.1)                        | 0 (0)                                     | 0 (0)                                         | 0 (0)                         |
| <b>Breed, n (%)</b>              |                             |                           |                                 |                                           |                                               |                               |
| 1. American Hunter               | 0 (0)                       | 0 (0)                     | 0 (0)                           | 0 (0)                                     | 1 (16.7)                                      | 0 (0)                         |
| 2. Basset                        | 0 (0)                       | 1 (3.2)                   | 0 (0)                           | 0 (0)                                     | 0 (0)                                         | 0 (0)                         |
| 3. Belgian shepherd              | 0 (0)                       | 1 (3.2)                   | 0 (0)                           | 1 (25.0)                                  | 0 (0)                                         | 0 (0)                         |
| 4. Bulldog                       | 0 (0)                       | 1 (3.2)                   | 0 (0)                           | 0 (0)                                     | 0 (0)                                         | 0 (0)                         |
| 5. Dalmatian                     | 0 (0)                       | 4 (12.9)                  | 0 (0)                           | 0 (0)                                     | 0 (0)                                         | 0 (0)                         |
| 6. Dachshund                     | 0 (0)                       | 4 (12.9)                  | 0 (0)                           | 0 (0)                                     | 0 (0)                                         | 0 (0)                         |
| 7. Brazilian Mastiff             | 0 (0)                       | 1 (3.2)                   | 0 (0)                           | 0 (0)                                     | 0 (0)                                         | 0 (0)                         |
| 8. German spitz                  | 0 (0)                       | 1 (3.2)                   | 0 (0)                           | 0 (0)                                     | 0 (0)                                         | 0 (0)                         |
| 9. Ilhaso Apso                   | 0 (0)                       | 1 (3.2)                   | 0 (0)                           | 0 (0)                                     | 0 (0)                                         | 0 (0)                         |
| 10. Labrador Retriever           | 0 (0)                       | 1 (3.2)                   | 0 (0)                           | 0 (0)                                     | 1 (16.7)                                      | 1 (50.0)                      |
| 11. Pitbull                      | 1 (2.0)                     | 0 (0)                     | 0 (0)                           | 0 (0)                                     | 1 (16.7)                                      | 0 (0)                         |
| 12. Pinscher                     | 2 (4.0)                     | 2 (6.5)                   | 2 (28.6)                        | 0 (0)                                     | 2 (33.3)                                      | 0 (0)                         |

| <b>Characteristics</b>           | <b>Healthy<br/>(Non-cancer)</b> | <b>Breast cancer<br/>(BC)</b> | <b>Soft tissue cancer<br/>(STC)</b> | <b>Transmissible<br/>venereal tumor<br/>(TVT)</b> | <b>Testicular &amp;<br/>prostate cancer<br/>(TPC)</b> | <b>Colorectal<br/>cancer<br/>(CC)</b> |
|----------------------------------|---------------------------------|-------------------------------|-------------------------------------|---------------------------------------------------|-------------------------------------------------------|---------------------------------------|
| 13. Poodle                       | 2 (4.0)                         | 3 (9.7)                       | 1 (14.3)                            | 1 (25.0)                                          | 0 (0)                                                 | 0 (0)                                 |
| 14. Shar-pei                     | 0 (0)                           | 0 (0)                         | 1 (14.3)                            | 0 (0)                                             | 0 (0)                                                 | 0 (0)                                 |
| 15. Chow chow                    | 2 (4.0)                         | 0 (0)                         | 0 (0)                               | 0 (0)                                             | 1 (16.7)                                              | 0 (0)                                 |
| 16. Shih Tzu                     | 9 (18.0)                        | 3 (9.7)                       | 1 (14.3)                            | 0 (0)                                             | 0 (0)                                                 | 0 (0)                                 |
| 17. Yorkshire                    | 5 (10.0)                        | 1 (3.2)                       | 0 (0)                               | 0 (0)                                             | 0 (0)                                                 | 0 (0)                                 |
| 18. Mixed                        | 29 (58.0)                       | 7 (22.6)                      | 2 (28.6)                            | 2 (50.0)                                          | 0 (0)                                                 | 1 (50.0)                              |
| <b>Castrated, n (%)</b>          | 13 (26.0)                       | 17 (54.8)                     | 2 (28.6)                            | 0 (0)                                             | 0 (0)                                                 | 0 (0)                                 |
| <b>Histologic picture, n (%)</b> |                                 |                               |                                     |                                                   |                                                       |                                       |
| Carcinoma                        | 0 (0)                           | 14 (45.2)                     | 0 (0)                               | 0 (0)                                             | 5 (83.3)                                              | 0 (0)                                 |
| Adenocarcinoma                   | 0 (0)                           | 1 (3.2)                       | 0 (0)                               | 0 (0)                                             | 0 (0)                                                 | 0 (0)                                 |
| Mastocytoma                      | 0 (0)                           | 0 (0)                         | 5 (71.4)                            | 0 (0)                                             | 0 (0)                                                 | 0 (0)                                 |
| Liposarcoma                      | 0 (0)                           | 0 (0)                         | 1 (14.3)                            | 0 (0)                                             | 0 (0)                                                 | 0 (0)                                 |
| Lipoma                           | 0 (0)                           | 0 (0)                         | 1 (14.3)                            | 0 (0)                                             | 0 (0)                                                 | 0 (0)                                 |
| Carcinosarcoma                   | 0 (0)                           | 3 (9.7)                       | 0 (0)                               | 0 (0)                                             | 0 (0)                                                 | 0 (0)                                 |
| Lymphosarcoma                    | 0 (0)                           | 0 (0)                         | 0 (0)                               | 4 (100.0)                                         | 0 (0)                                                 | 0 (0)                                 |
| Lymphoma                         | 0 (0)                           | 0 (0)                         | 0 (0)                               | 0 (0)                                             | 0 (0)                                                 | 2 (100.0)                             |
| Neoplasia                        | 0 (0)                           | 13 (41.9)                     | 0 (0)                               | 0 (0)                                             | 1 (16.7)                                              | 0 (0)                                 |
| <b>Metastasis, n (%)</b>         |                                 |                               |                                     |                                                   |                                                       |                                       |
| Metastatic                       | 0 (0)                           | 3 (9.7)                       | 1 (14.3)                            | 0 (0)                                             | 1 (16.7)                                              | 1 (50.0)                              |
| Restricted/Nodular               | 0 (0)                           | 28 (90.3)                     | 6 (85.7)                            | 4 (100.0)                                         | 5 (83.3)                                              | 1 (50.0)                              |
| <b>Cancer Therapy, n (%)</b>     |                                 |                               |                                     |                                                   |                                                       |                                       |
| Chemotherapy                     | 0 (0)                           | 11 (35.5)                     | 4 (57.1)                            | 4 (100.0)                                         | 2 (33.3)                                              | 2 (100.0)                             |
| None                             | 50 (100.0)                      | 20 (64.5)                     | 3 (42.9)                            | 0 (0)                                             | 4 (66.7)                                              | 0 (0)                                 |

**Table S2.** List of VOMs encountered in canine earwax samples via HS/GC-MS analysis, their target MS peak, level of identification (ID), retention times, canonical SMILES, and the occurrence (%) in the groups: H=healthy (cancer-free), CCG = collective cancer (all cancer samples), BC=breast cancer, STC=Soft Tissue Cancer, TVT=Transmissible Venereal Tumor, TPC= Testicular & Prostate Cancer, CC= Colorectal Cancer.

| N <sup>o</sup> a | Volatile organic metabolites (VOMS)      | Target peak (m/z) | Level of ID <sup>b</sup> | Absolute retention time (min) | Relative retention time | Canonical SMILES | CAS Number | Frequency of occurrence (%) |       |       |       |       |       |       |
|------------------|------------------------------------------|-------------------|--------------------------|-------------------------------|-------------------------|------------------|------------|-----------------------------|-------|-------|-------|-------|-------|-------|
|                  |                                          |                   |                          |                               |                         |                  |            | H                           | CCG   | BC    | STC   | TVT   | TPC   | CC    |
| 1                | Hydroxyurea                              | 44                | 3                        | 1.140                         | 0.041                   | C(=O)(N)NO       | 127-07-1   | 100.0                       | 100.0 | 100.0 | 100.0 | 100.0 | 100.0 | 100.0 |
| 2                | Dimethylamine                            | 44                | 3                        | 1.225                         | 0.045                   | CNC              | 124-40-3   | 96.0                        | 96.0  | 93.5  | 100.0 | 100.0 | 100.0 | 100.0 |
| 3                | Acetone                                  | 43                | 1                        | 1.548                         | 0.056                   | CC(=O)C          | 67-64-1    | 100.0                       | 100.0 | 100.0 | 100.0 | 100.0 | 100.0 | 100.0 |
| 4                | 2-Methylpropanal                         | 43                | 3                        | 2.126                         | 0.077                   | CC(C)C=O         | 78-84-2    | 90.0                        | 82.0  | 90.3  | 71.4  | 50.0  | 66.7  | 100.0 |
| 5                | Methylhydrazine                          | 46                | 3                        | 2.207                         | 0.080                   | CNN              | 60-34-4    | 22.0                        | 0.0   | 0.0   | 0.0   | 0.0   | 0.0   | 0.0   |
| 6                | 2,3-Dihydroxypropanoic acid              | 45                | 3                        | 2.335                         | 0.085                   | C(C(C(=O)O)O)O   | 473-81-4   | 30.0                        | 76.0  | 74.2  | 85.7  | 100.0 | 66.7  | 50.0  |
| 7                | <b>2-Hydroperoxypentane</b> <sup>c</sup> | 43                | 3                        | 2.570                         | 0.093                   | CCCC(C)OO        | 14018-58-7 | 82.0                        | 14.0  | 9.7   | 28.6  | 25.0  | 16.7  | 0.0   |
| 8                | 2-Butanone                               | 43                | 3                        | 2.684                         | 0.098                   | CCC(=O)C         | 78-93-3    | 26.0                        | 70.0  | 74.2  | 57.1  | 75.0  | 50.0  | 100.0 |
| 9                | <b>2-Methylfuran</b>                     | 82                | 3                        | 2.840                         | 0.103                   | CCC(=O)C         | 534-22-5   | 54.0                        | 16.0  | 12.9  | 28.6  | 50.0  | 0.0   | 0.0   |
| 10               | Acetic Acid                              | 43                | 1                        | 3.013                         | 0.110                   | CC(=O)O          | 64-19-7    | 52.0                        | 92.0  | 90.3  | 85.7  | 100.0 | 100.0 | 100.0 |
| 11               | <b>3-Methylbutanal</b>                   | 44                | 3                        | 4.028                         | 0.146                   | CC(C)CC=O        | 590-86-3   | 88.0                        | 98.0  | 96.8  | 100.0 | 100.0 | 100.0 | 100.0 |
| 12               | 2-Methylbutanal                          | 41                | 3                        | 4.339                         | 0.158                   | CCC(C)C=O        | 96-17-3    | 14.0                        | 92.0  | 93.5  | 85.7  | 100.0 | 83.3  | 100.0 |
| 13               | Pentanal                                 | 44                | 3                        | 5.626                         | 0.204                   | CCCCC=O          | 110-62-3   | 56.0                        | 70.0  | 71.0  | 71.4  | 75.0  | 50.0  | 100.0 |
| 14               | Heptane                                  | 43                | 1                        | 5.889                         | 0.214                   | CCCCCCC          | 142-82-5   | 18.0                        | 10.0  | 6.5   | 14.3  | 25.0  | 0.0   | 50.0  |
| 15               | Propylene Glycol                         | 45                | 3                        | 8.373                         | 0.304                   | CC(CO)O          | 57-55-6    | 12.0                        | 46.0  | 51.6  | 14.3  | 75.0  | 33.3  | 50.0  |
| 16               | 1H-Pyrrole                               | 67                | 3                        | 9.000                         | 0.327                   | C1=CNC=C1        | 109-97-7   | 14.0                        | 64.0  | 54.8  | 71.4  | 50.0  | 100.0 | 100.0 |
| 17               | 3-Methylheptane                          | 43                | 3                        | 9.540                         | 0.347                   | CCCCC(C)CC       | 589-81-1   | 2.0                         | 72.0  | 74.2  | 57.1  | 75.0  | 66.7  | 100.0 |

| N <sup>o</sup> a | Volatile organic metabolites (VOMS) | Target peak (m/z) | Level of ID <sup>b</sup> | Absolute retention time (min) | Relative retention time | Canonical SMILES | CAS Number | Frequency of occurrence (%) |      |      |       |       |       |       |
|------------------|-------------------------------------|-------------------|--------------------------|-------------------------------|-------------------------|------------------|------------|-----------------------------|------|------|-------|-------|-------|-------|
|                  |                                     |                   |                          |                               |                         |                  |            | H                           | CCG  | BC   | STC   | TVT   | TPC   | CC    |
| 18               | Acetamide                           | 59                | 3                        | 10.586                        | 0.385                   | CC(=O)N          | 60-35-5    | 10.0                        | 34.0 | 25.8 | 42.9  | 50.0  | 50.0  | 50.0  |
| 19               | Hexanal                             | 44                | 3                        | 11.627                        | 0.423                   | CCCCCC=O         | 66-25-1    | 16.0                        | 82.0 | 83.9 | 71.4  | 75.0  | 83.3  | 100.0 |
| 20               | N-Ethylacetamide                    | 43                | 3                        | 12.971                        | 0.471                   | CCNC(=O)C        | 625-50-3   | 22.0                        | 48.0 | 45.2 | 28.6  | 100.0 | 50.0  | 50.0  |
| 21               | 2-Methylpyrazine                    | 94                | 3                        | 13.430                        | 0.488                   | CC1=NC=CN=C1     | 109-08-0   | 18.0                        | 50.0 | 45.2 | 42.9  | 100.0 | 50.0  | 50.0  |
| 22               | Furfural                            | 96                | 3                        | 13.980                        | 0.508                   | C1=COC(=C1)C=O   | 98-01-1    | 6.0                         | 86.0 | 83.9 | 100.0 | 75.0  | 100.0 | 50.0  |
| 23               | <b>2-Furanmethanol</b>              | 98                | 3                        | 16.836                        | 0.612                   | C1=COC(=C1)CO    | 98-00-0    | 6.0                         | 48.0 | 41.9 | 57.1  | 75.0  | 50.0  | 50.0  |
| 24               | 5-Methylhexanal                     | 43                | 3                        | 17.640                        | 0.641                   | CC(C)CCCC=O      | 1860-39-5  | 4.0                         | 42.0 | 38.7 | 28.6  | 75.0  | 66.7  | 0.0   |
| 25               | 3-Methylbutanoic acid               | 60                | 3                        | 18.047                        | 0.656                   | CC(C)CC(=O)O     | 503-74-2   | 6.0                         | 36.0 | 38.7 | 14.3  | 50.0  | 33.3  | 50.0  |
| 26               | 2-Methylbutanoic acid               | 74                | 3                        | 18.958                        | 0.689                   | CCC(C)C(=O)O     | 116-53-0   | 4.0                         | 4.0  | 0.0  | 14.3  | 25.0  | 0.0   | 0.0   |
| 27               | 1,2,3-Butanetriol                   | 44                | 3                        | 19.339                        | 0.703                   | CC(C(CO)O)O      | 4435-50-1  | 4.0                         | 30.0 | 25.8 | 42.9  | 50.0  | 33.3  | 0.0   |
| 28               | Heptanal                            | 70                | 3                        | 21.555                        | 0.783                   | CCCCCCC=O        | 111-71-7   | 12.0                        | 52.0 | 48.4 | 71.4  | 50.0  | 50.0  | 50.0  |
| 29               | 3,4-Dimethyl-1,5-hexadiene          | 55                | 3                        | 22.275                        | 0.810                   | CC(C=C)C(C)C=C   | 4894-63-7  | 14.0                        | 6.0  | 3.2  | 14.3  | 25.0  | 0.0   | 0.0   |
| 30               | 1,4-Benzoquinone                    | 108               | 3                        | 23.100                        | 0.840                   | C1=CC(=O)C=CC1=O | 106-51-4   | 12.0                        | 34.0 | 41.9 | 42.9  | 25.0  | 0.0   | 0.0   |
| 31               | Vinyl propionate                    | 57                | 3                        | 24.919                        | 0.906                   | CCC(=O)OC=C      | 105-38-4   | 0.0                         | 6.0  | 6.5  | 14.3  | 0.0   | 0.0   | 0.0   |
| 32               | 1-Heptanol                          | 70                | 3                        | 26.068                        | 0.947                   | CCCCCCCCO        | 111-70-6   | 16.0                        | 20.0 | 16.1 | 28.6  | 50.0  | 16.7  | 0.0   |
| 33               | 5-Methyl-2-furaldehyde              | 110               | 3                        | 29.515                        | 1.073                   | CC1=CC=C(O1)C=O  | 620-02-0   | 14.0                        | 44.0 | 48.4 | 42.9  | 25.0  | 33.3  | 50.0  |
| 34               | Benzaldehyde                        | 77                | 3                        | 30.150                        | 1.096                   | C1=CC=C(C=C1)C=O | 100-52-7   | 10.0                        | 46.0 | 45.2 | 42.9  | 0.0   | 66.7  | 100.0 |
| 35               | 2-Cyclohexen-1-one                  | 68                | 3                        | 31.751                        | 1.154                   | C1CC=CC(=O)C1    | 930-68-7   | 10.0                        | 46.0 | 38.7 | 57.1  | 75.0  | 50.0  | 50.0  |
| 36               | 5,6-Dihydro-2H-pyran-2-one          | 68                | 3                        | 31.990                        | 1.163                   | C1COC(=O)C=C1    | 3393-45-1  | 18.0                        | 66.0 | 61.3 | 42.9  | 100.0 | 83.3  | 100.0 |
| 37               | 2-Ethyl-5-methylpyrazine            | 121               | 3                        | 33.206                        | 1.207                   | CCC1=NC=C(N=C1)C | 13360-64-0 | 6.0                         | 6.0  | 6.5  | 14.3  | 0.0   | 0.0   | 0.0   |
| 38               | 2,2-Dimethyldecane                  | 57                | 3                        | 33.465                        | 1.216                   | CCCCCCCC(C)(C)C  | 17302-37-3 | 26.0                        | 60.0 | 51.6 | 85.7  | 75.0  | 50.0  | 100.0 |

| N <sup>o</sup> a | Volatile organic metabolites (VOMS) | Target peak (m/z) | Level of ID <sup>b</sup> | Absolute retention time (min) | Relative retention time | Canonical SMILES      | CAS Number | Frequency of occurrence (%) |      |      |       |       |       |       |
|------------------|-------------------------------------|-------------------|--------------------------|-------------------------------|-------------------------|-----------------------|------------|-----------------------------|------|------|-------|-------|-------|-------|
|                  |                                     |                   |                          |                               |                         |                       |            | H                           | CCG  | BC   | STC   | TVT   | TPC   | CC    |
| 39               | 2-Pentylfuran                       | 81                | 3                        | 34.584                        | 1.257                   | CCCCC1=CC=CO1         | 3777-69-3  | 60.0                        | 46.0 | 48.4 | 71.4  | 0.0   | 33.3  | 50.0  |
| 40               | <b>Octanal</b>                      | 43                | 3                        | 34.795                        | 1.265                   | CCCCCCCC=O            | 124-13-0   | 0.0                         | 74.0 | 74.2 | 71.4  | 50.0  | 100.0 | 50.0  |
| 41               | Phenol                              | 94                | 3                        | 34.995                        | 1.272                   | C1=CC=C(C=C1)O        | 108-95-2   | 6.0                         | 42.0 | 48.4 | 28.6  | 25.0  | 33.3  | 50.0  |
| 42               | 2-Ethylhexanol                      | 57                | 3                        | 38.015                        | 1.382                   | CCCC(CC)CO            | 104-76-7   | 4.0                         | 46.0 | 45.2 | 57.1  | 25.0  | 50.0  | 50.0  |
| 43               | Phenylacetaldehyde                  | 91                | 3                        | 38.560                        | 1.401                   | C1=CC=C(C=C1)CC=O     | 122-78-1   | 4.0                         | 66.0 | 61.3 | 71.4  | 100.0 | 50.0  | 100.0 |
| 44               | 2-Methyl-2-heptenal                 | 41                | 3                        | 39.227                        | 1.426                   | CCCC=C(C)C=O          | 30567-26-1 | 8.0                         | 32.0 | 35.5 | 0.0   | 25.0  | 50.0  | 50.0  |
| 45               | 3-Methyl-2-cyclohexen-1-one         | 82                | 3                        | 39.439                        | 1.433                   | CC1=CC(=O)CCC1        | 1193-18-6  | 8.0                         | 66.0 | 67.7 | 71.4  | 75.0  | 50.0  | 50.0  |
| 46               | Butoxybenzene                       | 94                | 3                        | 41.530                        | 1.509                   | CCCCOC1=CC=CC=C1      | 1126-79-0  | 4.0                         | 42.0 | 45.2 | 14.3  | 25.0  | 50.0  | 100.0 |
| 47               | 2-Nonen-1-ol                        | 57                | 3                        | 41.665                        | 1.514                   | CCCCCCC=CCO           | 22104-79-6 | 2.0                         | 40.0 | 35.5 | 42.9  | 75.0  | 33.3  | 50.0  |
| 48               | 2-Pyrrolidone                       | 85                | 3                        | 41.910                        | 1.523                   | C1CC(=O)NC1           | 616-45-5   | 6.0                         | 26.0 | 22.6 | 14.3  | 75.0  | 16.7  | 50.0  |
| 49               | 1-Octanol                           | 56                | 3                        | 42.210                        | 1.534                   | CCCCCCCCO             | 111-87-5   | 6.0                         | 64.0 | 64.5 | 85.7  | 50.0  | 33.3  | 100.0 |
| 50               | Tetrahydro-6-methyl-2H-pyran-2-one  | 42                | 3                        | 42.803                        | 1.556                   | CC1CCCC(=O)O1         | 823-22-3   | 12.0                        | 66.0 | 54.8 | 71.4  | 100.0 | 83.3  | 100.0 |
| 51               | Tetrahydro-4-methyl-2H-pyran-2-one  | 42                | 3                        | 43.137                        | 1.568                   | CC1CCOC(=O)C1         | 1121-84-2  | 4.0                         | 64.0 | 58.1 | 57.1  | 100.0 | 66.7  | 100.0 |
| 52               | 2-Nonanone                          | 43                | 1                        | 43.672                        | 1.587                   | CCCCCCCC(=O)C         | 821-55-6   | 48.0                        | 84.0 | 80.6 | 100.0 | 100.0 | 83.3  | 50.0  |
| 53               | 2-Oxepanone                         | 42                | 3                        | 44.398                        | 1.614                   | C1CCC(=O)OCC1         | 502-44-3   | 4.0                         | 58.0 | 51.6 | 57.1  | 100.0 | 50.0  | 100.0 |
| 54               | Nonanal                             | 57                | 3                        | 44.891                        | 1.632                   | CCCCCCCC=O            | 124-19-6   | 14.0                        | 50.0 | 58.1 | 42.9  | 25.0  | 33.3  | 50.0  |
| 55               | 4H-Pyran-4-one                      | 96                | 3                        | 45.342                        | 1.648                   | C1=COC=CC1=O          | 108-97-4   | 2.0                         | 10.0 | 6.5  | 14.3  | 0.0   | 33.3  | 0.0   |
| 56               | Succinimide                         | 99                | 3                        | 46.891                        | 1.704                   | C1CC(=O)NC1=O         | 123-56-8   | 10.0                        | 30.0 | 25.8 | 28.6  | 75.0  | 16.7  | 50.0  |
| 57               | Isoborneol                          | 95                | 3                        | 49.321                        | 1.793                   | CC1(C2CCC1(C(C2)O)C)C | 124-76-5   | 58.0                        | 88.0 | 83.9 | 100.0 | 75.0  | 100.0 | 100.0 |
| 58               | <b>3-Decenoic acid</b>              | 43                | 3                        | 51.935                        | 1.888                   | CCCCCCC=CCC(=O)O      | 15469-77-9 | 12.0                        | 80.0 | 77.4 | 57.1  | 100.0 | 100.0 | 100.0 |

| N <sup>o</sup> a | Volatile organic metabolites (VOMS) | Target peak (m/z) | Level of ID <sup>b</sup> | Absolute retention time (min) | Relative retention time | Canonical SMILES                 | CAS Number | Frequency of occurrence (%) |      |      |       |       |       |       |
|------------------|-------------------------------------|-------------------|--------------------------|-------------------------------|-------------------------|----------------------------------|------------|-----------------------------|------|------|-------|-------|-------|-------|
|                  |                                     |                   |                          |                               |                         |                                  |            | H                           | CCG  | BC   | STC   | TVT   | TPC   | CC    |
| 59               | 1-Decanol                           | 70                | 3                        | 53.490                        | 1.944                   | CCCCCCCCCO                       | 112-30-1   | 0.0                         | 36.0 | 32.3 | 28.6  | 75.0  | 33.3  | 50.0  |
| 60               | Dodecane                            | 57                | 3                        | 54.502                        | 1.981                   | CCCCCCCCCCCC                     | 112-40-3   | 18.0                        | 38.0 | 35.5 | 28.6  | 100.0 | 16.7  | 50.0  |
| 61               | 4-Hydroxyquinazoline                | 146               | 3                        | 57.575                        | 2.092                   | C1=CC=C2C(=C1)C(=O)NC=N2         | 491-36-1   | 12.0                        | 28.0 | 19.4 | 42.9  | 50.0  | 50.0  | 0.0   |
| 62               | Undecanal                           | 41                | 3                        | 58.765                        | 2.136                   | CCCCCCCCCCC=O                    | 112-44-7   | 30.0                        | 76.0 | 71.0 | 71.4  | 75.0  | 100.0 | 100.0 |
| 63               | Hydroquinone                        | 110               | 3                        | 59.874                        | 2.176                   | C1=CC(=CC=C1O)O                  | 123-31-9   | 40.0                        | 74.0 | 71.0 | 85.7  | 100.0 | 66.7  | 50.0  |
| 64               | <b>1,1-Dibutoxyhexadecane</b>       | 57                | 3                        | 61.350                        | 2.230                   | CCCCCCCCCCCCCC<br>CC(OCCCC)OCCCC | 18302-68-6 | 14.0                        | 64.0 | 64.5 | 57.1  | 100.0 | 50.0  | 50.0  |
| 65               | 2,4-Dodecadienal                    | 81                | 3                        | 61.724                        | 2.243                   | CCCCCCCC=CC=CC=O                 | 13162-47-5 | 28.0                        | 80.0 | 80.6 | 57.1  | 75.0  | 100.0 | 100.0 |
| 66               | 8-Methyl-1-undecene                 | 43                | 3                        | 62.965                        | 2.288                   | CCCC(C)CCCCC=C                   | 74630-40-3 | 50.0                        | 64.0 | 58.1 | 71.4  | 100.0 | 50.0  | 100.0 |
| 67               | 3-Methylenetridecane                | 70                | 3                        | 63.656                        | 2.314                   | CCCCCCCCCCC(=C)CC                | 19780-34-8 | 52.0                        | 68.0 | 67.7 | 57.1  | 75.0  | 83.3  | 50.0  |
| 68               | 5-Pentylidihydro-2(3H)-furanone     | 85                | 3                        | 64.304                        | 2.337                   | CCCCC1CCC(=O)O1                  | 104-61-0   | 30.0                        | 64.0 | 58.1 | 85.7  | 75.0  | 66.7  | 50.0  |
| 69               | 2,6-Dimethyl-4-propyl-4-heptanol    | 129               | 3                        | 64.573                        | 2.347                   | CCCC(CCC)(CC(C)(C)C)O            | 54774-83-3 | 18.0                        | 62.0 | 64.5 | 57.1  | 100.0 | 33.3  | 50.0  |
| 70               | Resorcinol monoacetate              | 110               | 3                        | 65.050                        | 2.364                   | CC(=O)OC1=CC=CC(=C1)O            | 102-29-4   | 88.0                        | 82.0 | 83.9 | 100.0 | 100.0 | 66.7  | 0.0   |
| 71               | Tetradecane                         | 57                | 1                        | 65.818                        | 2.392                   | CCCCCCCCCCCCCCC                  | 629-59-4   | 70.0                        | 34.0 | 29.0 | 57.1  | 50.0  | 33.3  | 0.0   |
| 72               | Dodecanal                           | 41                | 3                        | 66.050                        | 2.401                   | CCCCCCCCCCC=O                    | 112-54-9   | 10.0                        | 36.0 | 45.2 | 28.6  | 0.0   | 16.7  | 50.0  |
| 73               | Pentadecane                         | 57                | 1                        | 66.240                        | 2.407                   | CCCCCCCCCCCCCCC<br>C             | 629-62-9   | 24.0                        | 32.0 | 32.3 | 57.1  | 25.0  | 0.0   | 50.0  |
| 74               | Dimethyl phthalate                  | 163               | 3                        | 67.435                        | 2.451                   | COC(=O)C1=CC=CC(=C1)OC           | 131-11-3   | 40.0                        | 68.0 | 67.7 | 85.7  | 50.0  | 50.0  | 100.0 |
| 75               | <b>1-Dodecanol</b>                  | 55                | 3                        | 68.140                        | 2.476                   | CCCCCCCCCCCCCO                   | 112-53-8   | 54.0                        | 94.0 | 90.3 | 100.0 | 100.0 | 100.0 | 100.0 |



| N <sup>o</sup> a | Volatile organic metabolites (VOMS) | Target peak (m/z) | Level of ID <sup>b</sup> | Absolute retention time (min) | Relative retention time | Canonical SMILES                          | CAS Number | Frequency of occurrence (%) |      |      |       |       |       |       |
|------------------|-------------------------------------|-------------------|--------------------------|-------------------------------|-------------------------|-------------------------------------------|------------|-----------------------------|------|------|-------|-------|-------|-------|
|                  |                                     |                   |                          |                               |                         |                                           |            | H                           | CCG  | BC   | STC   | TVT   | TPC   | CC    |
| 76               | 9-Decen-1-yl acetate                | 43                | 3                        | 68.516                        | 2.490                   | <chem>CC(=O)OCCCCCCCC=C</chem>            | 50816-18-7 | 60.0                        | 32.0 | 35.5 | 14.3  | 50.0  | 16.7  | 50.0  |
| 77               | 1-Tridecanol                        | 55                | 3                        | 68.625                        | 2.494                   | <chem>CCCCCCCCCCCCCO</chem>               | 112-70-9   | 50.0                        | 54.0 | 58.1 | 57.1  | 25.0  | 33.3  | 100.0 |
| 78               | <b>2-Dodecanone</b>                 | 58                | 3                        | 68.776                        | 2.500                   | <chem>CCCCCCCCCCC(=O)C</chem>             | 6175-49-1  | 90.0                        | 58.0 | 51.6 | 71.4  | 100.0 | 50.0  | 50.0  |
| 79               | <b>Hexadecane</b>                   | 57                | 1                        | 68.955                        | 2.506                   | <chem>CCCCCCCCCCCCCC</chem>               | 544-76-3   | 16.0                        | 82.0 | 74.2 | 100.0 | 100.0 | 100.0 | 50.0  |
| 80               | Tridecanal                          | 57                | 3                        | 69.285                        | 2.518                   | <chem>CCCCCCCCCCCCC=O</chem>              | 10486-19-8 | 12.0                        | 78.0 | 80.6 | 85.7  | 75.0  | 66.7  | 50.0  |
| 81               | Tetradecanal                        | 57                | 3                        | 69.669                        | 2.532                   | <chem>CCCCCCCCCCCCC=O</chem>              | 124-25-4   | 40.0                        | 48.0 | 54.8 | 42.9  | 50.0  | 16.7  | 50.0  |
| 82               | Uric acid                           | 43                | 3                        | 69.856                        | 2.539                   | <chem>C12=C(NC(=O)N1)N(C(=O)NC2=O)</chem> | 69-93-2    | 38.0                        | 20.0 | 16.1 | 42.9  | 50.0  | 0.0   | 0.0   |
| 83               | Dodecanoic acid                     | 73                | 3                        | 70.594                        | 2.566                   | <chem>CCCCCCCCCCC(=O)O</chem>             | 143-07-7   | 62.0                        | 72.0 | 71.0 | 71.4  | 100.0 | 66.7  | 50.0  |
| 84               | 1-Tetradecanol                      | 55                | 3                        | 70.908                        | 2.577                   | <chem>CCCCCCCCCCCCCO</chem>               | 112-72-1   | 84.0                        | 80.0 | 77.4 | 85.7  | 75.0  | 100.0 | 50.0  |
| 85               | 1-Cyclododecylethanone              | 43                | 3                        | 71.180                        | 2.587                   | <chem>CC(=O)C1CCCCCCC1</chem>             | 28925-00-0 | 64.0                        | 46.0 | 51.6 | 57.1  | 25.0  | 33.3  | 0.0   |
| 86               | 2-Hexyl-1-decanol                   | 57                | 3                        | 71.379                        | 2.594                   | <chem>CCCCCCCC(CCCC)CO</chem>             | 2425-77-6  | 72.0                        | 48.0 | 54.8 | 28.6  | 50.0  | 33.3  | 50.0  |
| 87               | 2-Tridecanone                       | 58                | 3                        | 71.450                        | 2.597                   | <chem>CCCCCCCCCCC(=O)C</chem>             | 593-08-8   | 24.0                        | 62.0 | 58.1 | 71.4  | 25.0  | 83.3  | 100.0 |
| 88               | <b>Octadecane</b>                   | 57                | 3                        | 71.546                        | 2.600                   | <chem>CCCCCCCCCCCCCC</chem>               | 593-45-3   | 80.0                        | 84.0 | 77.4 | 85.7  | 100.0 | 100.0 | 100.0 |
| 89               | Pentadecanal                        | 82                | 3                        | 71.910                        | 2.613                   | <chem>CCCCCCCCCCCCC=O</chem>              | 2765-11-9  | 26.0                        | 82.0 | 80.6 | 71.4  | 100.0 | 83.3  | 100.0 |
| 90               | Hexadecanal                         | 82                | 3                        | 72.270                        | 2.627                   | <chem>CCCCCCCCCCCCCC=O</chem>             | 629-80-1   | 60.0                        | 60.0 | 61.3 | 57.1  | 50.0  | 66.7  | 50.0  |

| N <sup>o</sup> a | Volatile organic metabolites (VOMS) | Target peak (m/z) | Level of ID <sup>b</sup> | Absolute retention time (min) | Relative retention time | Canonical SMILES           | CAS Number | Frequency of occurrence (%) |      |      |       |       |       |       |
|------------------|-------------------------------------|-------------------|--------------------------|-------------------------------|-------------------------|----------------------------|------------|-----------------------------|------|------|-------|-------|-------|-------|
|                  |                                     |                   |                          |                               |                         |                            |            | H                           | CCG  | BC   | STC   | TVT   | TPC   | CC    |
| 91               | n-Tetradecanoic acid                | 73                | 3                        | 73.020                        | 2.654                   | CCCCCCCCCCCCC(=O)O         | 544-63-8   | 70.0                        | 80.0 | 77.4 | 71.4  | 100.0 | 100.0 | 50.0  |
| 92               | 1-Pentadecanol                      | 43                | 3                        | 73.286                        | 2.663                   | CCCCCCCCCCCCCO             | 629-76-5   | 76.0                        | 64.0 | 58.1 | 57.1  | 75.0  | 100.0 | 50.0  |
| 93               | <b>2-Tetradecanone</b>              | 58                | 3                        | 73.385                        | 2.667                   | CCCCCCCCCCCCC(=O)C         | 2345-27-9  | 82.0                        | 74.0 | 67.7 | 100.0 | 75.0  | 83.3  | 50.0  |
| 94               | <b>5-Dodecyl acetate</b>            | 43                | 3                        | 73.643                        | 2.676                   | CCCCCC=CCCCCO<br>C(=O)C    | 16676-96-3 | 88.0                        | 42.0 | 45.2 | 28.6  | 25.0  | 33.3  | 100.0 |
| 95               | 2-Pentadecanone                     | 58                | 3                        | 73.880                        | 2.685                   | CCCCCCCCCCCCC(=O)C         | 2345-28-0  | 32.0                        | 76.0 | 74.2 | 71.4  | 100.0 | 66.7  | 100.0 |
| 96               | 11-Dodecen-1-yl acetate             | 43                | 3                        | 73.935                        | 2.687                   | CC(=O)OCCCCCCC<br>CCC=C    | 35153-10-7 | 14.0                        | 52.0 | 51.6 | 42.9  | 50.0  | 50.0  | 100.0 |
| 97               | 3-Pyrrolidin-2-yl-propanoic acid    | 70                | 3                        | 74.083                        | 2.692                   | C1CC(NC1)CCC(=O)O          | 18325-18-3 | 24.0                        | 36.0 | 32.3 | 57.1  | 0.0   | 66.7  | 0.0   |
| 98               | 2-(dodecyloxy)ethanol               | 57                | 3                        | 74.218                        | 2.697                   | CCCCCCCCCCCCOC<br>CO       | 4536-30-5  | 26.0                        | 56.0 | 58.1 | 42.9  | 25.0  | 66.7  | 100.0 |
| 99               | 2-Octyl-1-decanol                   | 57                | 3                        | 74.390                        | 2.704                   | CCCCCCCC(CCCC<br>CCCC)CO   | 45235-48-1 | 52.0                        | 76.0 | 71.0 | 57.1  | 100.0 | 100.0 | 100.0 |
| 100              | n-Pentadecanoic acid                | 73                | 3                        | 75.257                        | 2.735                   | CCCCCCCCCCCCC<br>C(=O)O    | 1002-84-2  | 50.0                        | 76.0 | 77.4 | 57.1  | 75.0  | 83.3  | 100.0 |
| 101              | 2-Hexadecanone                      | 58                | 3                        | 75.360                        | 2.739                   | CCCCCCCCCCCCC<br>C(=O)C    | 18787-63-8 | 20.0                        | 56.0 | 51.6 | 71.4  | 50.0  | 50.0  | 100.0 |
| 102              | 2-Heptadecanone                     | 58                | 3                        | 75.587                        | 2.747                   | CCCCCCCCCCCCC<br>CC(=O)C   | 2922-51-2  | 70.0                        | 66.0 | 58.1 | 71.4  | 100.0 | 66.7  | 100.0 |
| 103              | 1-Octadecanol                       | 43                | 3                        | 75.875                        | 2.758                   | CCCCCCCCCCCCC<br>CCCC      | 112-92-5   | 66.0                        | 68.0 | 64.5 | 71.4  | 50.0  | 83.3  | 100.0 |
| 104              | Isopropyl myristate                 | 43                | 3                        | 76.177                        | 2.769                   | CCCCCCCCCCCC<br>(=O)OC(C)C | 110-27-0   | 72.0                        | 42.0 | 32.3 | 57.1  | 50.0  | 66.7  | 50.0  |
| 105              | N-butylbenzenesulfonamide           | 77                | 3                        | 76.801                        | 2.791                   | CCCCNS(=O)(=O)C1           | 3622-84-2  | 28.0                        | 64.0 | 64.5 | 42.9  | 75.0  | 66.7  | 100.0 |

| N <sup>o</sup> a | Volatile organic metabolites (VOMS) | Target peak (m/z) | Level of ID <sup>b</sup> | Absolute retention time (min) | Relative retention time | Canonical SMILES                    | CAS Number | Frequency of occurrence (%) |      |      |       |       |       |       |  |
|------------------|-------------------------------------|-------------------|--------------------------|-------------------------------|-------------------------|-------------------------------------|------------|-----------------------------|------|------|-------|-------|-------|-------|--|
|                  |                                     |                   |                          |                               |                         |                                     |            | H                           | CCG  | BC   | STC   | TVT   | TPC   | CC    |  |
|                  |                                     |                   |                          |                               |                         | =CC=CC=C1                           |            |                             |      |      |       |       |       |       |  |
| 106              | 2-Nonadecanone                      | 58                | 3                        | 77.037                        | 2.800                   | CCCCCCCCCCCCCCCCCCCC(=O)C           | 629-66-3   | 56.0                        | 76.0 | 80.6 | 57.1  | 75.0  | 66.7  | 100.0 |  |
| 107              | n-Octadecanoic acid                 | 43                | 3                        | 78.244                        | 2.844                   | CCCCCCCCCCCCCCCCCCCC(=O)O           | 57-11-4    | 90.0                        | 96.0 | 93.5 | 100.0 | 100.0 | 100.0 | 100.0 |  |
| 108              | <b>n-Nonadecanoic acid</b>          | 43                | 3                        | 78.405                        | 2.850                   | CCCCCCCCCCCCCCCCCCCC(=O)O           | 646-30-0   | 22.0                        | 54.0 | 58.1 | 57.1  | 25.0  | 33.3  | 100.0 |  |
| 109              | Butyl isodecyl phthalate            | 149               | 3                        | 78.636                        | 2.858                   | CCCCOC(=O)C1=CC=CC=C1C(=O)OCCCC(C)C | 89-18-9    | 26.0                        | 80.0 | 77.4 | 71.4  | 100.0 | 83.3  | 100.0 |  |
| 110              | Cyclopentadecanone                  | 55                | 3                        | 78.920                        | 2.868                   | C1CCCCCCCC(=O)CCCCC1                | 502-72-7   | 84.0                        | 78.0 | 74.2 | 71.4  | 100.0 | 83.3  | 100.0 |  |
| 111              | 2-Hydroxycyclopentadecanone         | 55                | 3                        | 79.047                        | 2.873                   | C1CCCCCCCC(C(=O)CCCCC1)O            | 4727-18-8  | 16.0                        | 82.0 | 77.4 | 85.7  | 100.0 | 100.0 | 50.0  |  |
| 112              | 6,10,14-Trimethyl-2-pentadecanone   | 43                | 3                        | 79.708                        | 2.897                   | CC(C)CCCC(C)CCCC(C)CCCC(=O)C        | 502-69-2   | 64.0                        | 74.0 | 67.7 | 85.7  | 100.0 | 66.7  | 100.0 |  |
| 113              | Methyl Palmitoleate                 | 55                | 3                        | 79.880                        | 2.903                   | CCCCCCC=CCCCCCC(=O)OC               | 1120-25-8  | 26.0                        | 76.0 | 71.0 | 85.7  | 100.0 | 83.3  | 50.0  |  |
| 114              | Eicosanoic acid                     | 43                | 3                        | 80.342                        | 2.920                   | CCCCCCCCCCCCCCCCCCCC(=O)O           | 506-30-9   | 46.0                        | 60.0 | 58.1 | 71.4  | 50.0  | 50.0  | 100.0 |  |
| 115              | <b>Methyl Palmitate</b>             | 74                | 3                        | 80.510                        | 2.926                   | CCCCCCCCCCCCCCCCCCCC(=O)OC          | 112-39-0   | 38.0                        | 76.0 | 64.5 | 100.0 | 100.0 | 83.3  | 100.0 |  |
| 116              | N-methyldodecanamide                | 73                | 3                        | 81.830                        | 2.974                   | CCCCCCCCCCCCCCCC(=O)NC              | 27563-67-3 | 66.0                        | 42.0 | 32.3 | 57.1  | 50.0  | 66.7  | 50.0  |  |
| 117              | Methyl Heptadecanoate               | 74                | 3                        | 82.458                        | 2.997                   | CCCCCCCCCCCCCCCCCCCC(=O)OC          | 1731-92-6  | 32.0                        | 50.0 | 41.9 | 71.4  | 50.0  | 66.7  | 50.0  |  |
| 118              | Tetradecanamide                     | 59                | 3                        | 82.867                        | 3.012                   | CCCCCCCCCCCCCCCC(=O)N               | 638-58-4   | 38.0                        | 18.0 | 19.4 | 14.3  | 25.0  | 16.7  | 0.0   |  |

| N <sup>o</sup> <sup>a</sup> | Volatile organic metabolites (VOMS) | Target peak (m/z) | Level of ID <sup>b</sup> | Absolute retention time (min) | Relative retention time | Canonical SMILES                            | CAS Number | Frequency of occurrence (%) |      |      |       |       |       |       |
|-----------------------------|-------------------------------------|-------------------|--------------------------|-------------------------------|-------------------------|---------------------------------------------|------------|-----------------------------|------|------|-------|-------|-------|-------|
|                             |                                     |                   |                          |                               |                         |                                             |            | H                           | CCG  | BC   | STC   | TVT   | TPC   | CC    |
| 119                         | Eicosanol                           | 43                | 3                        | 84.955                        | 3.088                   | CCCCCCCCCCCCCCCCCCCCCO                      | 629-96-9   | 38.0                        | 62.0 | 54.8 | 85.7  | 75.0  | 66.7  | 50.0  |
| 120                         | Methyl Linoleate                    | 67                | 3                        | 85.449                        | 3.106                   | CCCCC=CCC=CCCCCCCC(=O)OC                    | 112-63-0   | 52.0                        | 74.0 | 80.6 | 71.4  | 25.0  | 83.3  | 50.0  |
| 121                         | <b>Methyl stearate</b>              | 74                | 3                        | 85.930                        | 3.123                   | CCCCCCCCCCCCCCCCCCCC(=O)OC                  | 112-61-8   | 18.0                        | 68.0 | 58.1 | 85.7  | 75.0  | 100.0 | 50.0  |
| 122                         | Heneicosanoic acid                  | 326               | 3                        | 86.653                        | 3.149                   | CCCCCCCCCCCCCCCCCCCC(=O)O                   | 2363-71-5  | 100.0                       | 88.0 | 83.9 | 85.7  | 100.0 | 100.0 | 100.0 |
| 123                         | Octadecanamide                      | 59                | 3                        | 87.065                        | 3.164                   | CCCCCCCCCCCCCCCCCCCC(=O)N                   | 124-26-5   | 48.0                        | 78.0 | 67.7 | 85.7  | 100.0 | 100.0 | 100.0 |
| 124                         | Butyl palmitate                     | 56                | 3                        | 87.222                        | 3.170                   | CCCCCCCCCCCCCCCCCCCC(=O)OCCCC               | 111-06-8   | 14.0                        | 86.0 | 83.9 | 85.7  | 75.0  | 100.0 | 100.0 |
| 125                         | 1-Heneicosanol                      | 55                | 3                        | 89.074                        | 3.237                   | CCCCCCCCCCCCCCCCCCCCCO                      | 15594-90-8 | 24.0                        | 58.0 | 58.1 | 42.9  | 50.0  | 83.3  | 50.0  |
| 126                         | <b>Heneicosane</b>                  | 57                | 3                        | 89.920                        | 3.268                   | CCCCCCCCCCCCCCCCCCCC                        | 629-94-7   | 2.0                         | 78.0 | 71.0 | 100.0 | 75.0  | 100.0 | 50.0  |
| 127                         | <b>Butyl stearate</b>               | 56                | 3                        | 92.011                        | 3.344                   | CCCCCCCCCCCCCCCCCCCC(=O)OCCCC               | 123-95-5   | 82.0                        | 62.0 | 61.3 | 71.4  | 50.0  | 66.7  | 50.0  |
| 128                         | Bis(2-ethylhexyl) phthalate         | 149               | 3                        | 97.594                        | 3.547                   | CCCCC(CC)COC(=O)C1=CC=CC=C1C(=O)OCC(CC)CCCC | 117-81-7   | 54.0                        | 74.0 | 71.0 | 71.4  | 50.0  | 100.0 | 100.0 |

<sup>a</sup> VOMs are presented in order of increasing relative retention time to the internal standard (3-methylcyclohexanone); <sup>b</sup> Level of ID: 1 – Metabolites confirmed with authentic standards. 3 – Metabolites with at least 80% matching with the NIST17s libraries and confirmed by their retention times with the in-house cerumen database. <sup>c</sup> VOMs selected as potential cancer biomarkers using variable selection combining genetic algorithm (GA) and partial least squares (PLS) were highlighted in bold.

**Table S3.** Summary performance of the chromosomes (I–XII) in the GA-PLS for the cerumenogram model after repeated k-fold cross-validation (k=10, repeats=10) using 80% of the samples as the training set (80 samples) and 20% as the test set (20 samples).

| GA-PLS models         |                         |                  |                        |                                                                                                                                                                                                                  | Training set (80samples) |                   |                   |             |                            |                             | Test set (20 samples)  |       |       |             |               |                |
|-----------------------|-------------------------|------------------|------------------------|------------------------------------------------------------------------------------------------------------------------------------------------------------------------------------------------------------------|--------------------------|-------------------|-------------------|-------------|----------------------------|-----------------------------|------------------------|-------|-------|-------------|---------------|----------------|
| <sup>a</sup> Chrom No | <sup>b</sup> No of comp | <sup>c</sup> ROC | <sup>d</sup> No of var | <sup>e</sup> Variable Importance, N (%)                                                                                                                                                                          | Accuracy (95% CI)        | <sup>f</sup> Sens | <sup>g</sup> Spec | Kappa value | <sup>h</sup> H. Pred Value | <sup>i</sup> CA. Pred Value | Accuracy (95% CI)      | Sens  | Spec  | Kappa value | H. Pred Value | CA. Pred Value |
| I                     | 1                       | 1.000            | 18                     | VOMs: 126(100.0), 79(90.4), 40(89.4), 7(87.2), 58(83.4), 121(66.1), 64(62.5), 23(54.8), 94(51.7), 9(50.7), 115(50.2), 78(44.7), 75(41.3), 108(38.7), 127(20.8), 11(8.2), 88(4.1), 93(0)                          | 1.000<br>(0.955-1.000)   | 1.000             | 1.000             | 1.000       | 1.000                      | 1.000                       | 0.950<br>(0.751-0.999) | 1.000 | 0.929 | 0.900       | 0.909         | 1.000          |
| II                    | 1                       | 0.946            | 27                     | VOMs: 79(100.0), 109(82.9), 121(75.5), 36(67.4), 6(66.5), 8(62.7), 42(60.7), 87(59.3), 9(49.1), 21(47.5), 125(46.7), 63(45.4), 74(41.4), 52(40.1), 57(39.9), 5(34.6), 30(31.7), 72(27.4), 116(25.8), 67(24.1)    | 0.900<br>(0.812-0.956)   | 0.923             | 0.878             | 0.800       | 0.878                      | 0.913                       | 0.900<br>(0.683-0.988) | 1.000 | 0.778 | 0.794       | 0.846         | 1.000          |
| III                   | 3                       | 0.994            | 20                     | VOMs: 126(100.0), 124(95.5), 109(75.4), 89(69.4), 121(67.0), 6(58.0), 62(57.3), 8(49.5), 125(48.6), 74(44.2), 57(34.4), 39(30.6), 21(26.9), 91(24.8), 83(24.7), 44(24.6), 112(16.7), 107(5.2), 11(3.5), 93(0)    | 0.975<br>(0.913-0.997)   | 1.000             | 0.944             | 0.949       | 0.956                      | 1.000                       | 0.750<br>(0.509-0.913) | 1.000 | 0.643 | 0.519       | 0.545         | 1.000          |
| IV                    | 3                       | 0.976            | 22                     | VOMs: 126(100.0), 89(76.9), 121(56.9), 10(49.6), 52(49.3), 71(46.1), 8(45.0), 57(42.3), 21(40.4), 125(39.6), 74(33.5), 98(25.6), 39(18.5), 81(17.8), 91(17.5), 93(17.0), 61(14.9), 11(13.6), 97(13.4), 112(12.4) | 0.975<br>(0.913-0.997)   | 0.976             | 0.974             | 0.950       | 0.976                      | 0.974                       | 0.800<br>(0.563-0.943) | 1.000 | 0.636 | 0.612       | 0.692         | 1.000          |
| V                     | 3                       | 0.940            | 24                     | VOMs: 126(100.0), 109(61.6), 89(53.5), 8(52.6), 6(51.9), 59(43.5), 63(42.8), 52(42.5), 78(42.3), 30(34.3), 125(33.5), 98(32.8), 57(31.8), 44(28.3), 56(25.3), 21(23.5), 39(17.9), 77(12.9), 11(10.4), 13(10.3)   | 0.975<br>(0.913-0.997)   | 1.000             | 0.947             | 0.950       | 0.954                      | 1.000                       | 0.950<br>(0.751-0.999) | 1.000 | 0.917 | 0.900       | 0.889         | 1.000          |
| VI                    | 2                       | 0.961            | 24                     | VOMs: 126(100.0), 79(90.4), 109(64.6), 6(59.5), 42(56.2), 121(55.0), 8(54.8), 63(45.0), 101(43.0), 52(36.9), 125(36.8), 98(34.0), 44(31.8), 56(28.7), 127(26.6), 99(22.6), 39(18.8), 61(11.2), 84(7.4), 83(6.8)  | 0.962<br>(0.894-0.992)   | 0.976             | 0.949             | 0.925       | 0.952                      | 0.974                       | 0.900<br>(0.683-0.988) | 1.000 | 0.818 | 0.802       | 0.818         | 1.000          |

| GA-PLS models         |                         |                  |                        |                                                                                                                                                                                                                     | Training set (80samples) |                   |                   |             |                            |                             | Test set (20 samples)  |       |       |             |               |                |
|-----------------------|-------------------------|------------------|------------------------|---------------------------------------------------------------------------------------------------------------------------------------------------------------------------------------------------------------------|--------------------------|-------------------|-------------------|-------------|----------------------------|-----------------------------|------------------------|-------|-------|-------------|---------------|----------------|
| <sup>a</sup> Chrom No | <sup>b</sup> No of comp | <sup>c</sup> ROC | <sup>d</sup> No of var | <sup>e</sup> Variable Importance, N (%)                                                                                                                                                                             | Accuracy (95% CI)        | <sup>f</sup> Sens | <sup>g</sup> Spec | Kappa value | <sup>h</sup> H. Pred Value | <sup>i</sup> CA. Pred Value | Accuracy (95% CI)      | Sens  | Spec  | Kappa value | H. Pred Value | CA. Pred Value |
| VII                   | 3                       | 0.963            | 24                     | VOMs: 126(100.0), 79(80.6), 109(68.4), 8(54.6), 95(54.3), 6(51.1), 9(47.8), 57(45.3), 21(43.2), 125(41.0), 72(37.8), 98(32.8), 5(29.7), 61(23.2), 39(22.5), 11(18.3), 110(17.6), 83(16.5), 107(15.2), 77(14.1)      | 0.975<br>(0.913-0.997)   | 1.000             | 0.952             | 0.950       | 0.950                      | 1.000                       | 0.950<br>(0.751-0.999) | 0.917 | 1.000 | 0.900       | 1.000         | 0.889          |
| VIII                  | 1                       | 0.940            | 24                     | VOMs: 126(100.0), 79(81.0), 109(77.9), 6(74.7), 121(57.8), 8(54.9), 28(53.9), 42(53.3), 125(47.7), 59(46.2), 63(45.7), 98(37.8), 21(37.7), 57(36.6), 72(33.3), 74(28.9), 67(19.4), 83(16.7), 77(12.3), 11(12.1)     | 0.962<br>(0.894-0.992)   | 1.000             | 0.925             | 0.925       | 0.930                      | 1.000                       | 0.900<br>(0.683-0.988) | 1.000 | 0.800 | 0.800       | 0.833         | 1.000          |
| IX                    | 2                       | 0.989            | 25                     | VOMs: 58(100.0), 22(96.4), 126(95.1), 109(72.5), 121(57.3), 6(46.1), 125(45.9), 21(44.8), 98(39.1), 25(36.1), 57(35.8), 44(33.9), 30(33.8), 100(32.6), 72(26.0), 74(25.6), 110(23.1), 112(17.5), 61(16.5), 39(12.6) | 0.966<br>(0.907-0.999)   | 0.975             | 0.955             | 0.921       | 0.929                      | 0.985                       | 0.926<br>(0.757-0.991) | 0.900 | 0.941 | 0.841       | 0.900         | 0.941          |
| X                     | 4                       | 0.971            | 20                     | VOMs: 124(100.0), 89(70.2), 109(62.4), 6(60.3), 121(57.5), 10(55.5), 87(55.4), 62(50.0), 21(45.0), 63(41.6), 125(39.4), 98(36.6), 57(36.3), 44(27.6), 120(24.7), 48(21.8), 72(19.8), 39(13.0), 91(11.8), 11(0)      | 0.962<br>(0.894-0.992)   | 0.976             | 0.949             | 0.925       | 0.952                      | 0.974                       | 0.900<br>(0.683-0.988) | 0.889 | 0.909 | 0.798       | 0.889         | 0.909          |
| XI                    | 1                       | 0.962            | 16                     | VOMs: 126(100.0), 79(76.3), 58(76.1), 109(59.3), 121(58.8), 45(54.6), 6(42.0), 8(38.3), 63(35.3), 125(34.4), 98(31.0), 74(25.3), 21(23.5), 72(15.9), 39(14.6), 11(0)                                                | 0.912<br>(0.828-0.964)   | 0.927             | 0.897             | 0.825       | 0.905                      | 0.921                       | 0.900<br>(0.683-0.988) | 1.000 | 0.818 | 0.802       | 0.818         | 1.000          |
| XII                   | 1                       | 0.960            | 7                      | VOMs: 126(100), 58(83.6), 109(56.3), 121(51.9), 6(24.4), 125(15.0), 21(0)                                                                                                                                           | 0.912<br>(0.828-0.964)   | 0.974             | 0.854             | 0.825       | 0.864                      | 0.972                       | 0.900<br>(0.683-0.988) | 0.909 | 0.889 | 0.798       | 0.909         | 0.889          |

<sup>a</sup> The chromosome number of the GA algorithm; <sup>b</sup> The optimal number of PLS components; <sup>c</sup> Receiver operating characteristic; <sup>d</sup> The number of variables in the chromosome; <sup>e</sup> Top 20 variable Importance of the chromosome; <sup>f</sup> Sensitivity; <sup>g</sup> Specificity; <sup>h</sup> Healthy predictive value; <sup>i</sup> Cancer predictive value.

**Table S4.** MultiROC curve-based model evaluation (tester) results of the 33 earwax samples collected longitudinally from 18 tumor-bearing dogs. The potential cancer biomarkers discrimination set accurately predicts the samples as cancer (Y: Cancer group).

| <b>Sample number of the animal in the dendrogram*</b> | <b>Sample identification‡</b> | <b>Probability</b> | <b>Predict Class</b> | <b>True Class</b> | <b>Chemotherapy</b> | <b>Cancer Type</b> |
|-------------------------------------------------------|-------------------------------|--------------------|----------------------|-------------------|---------------------|--------------------|
| <b>39</b>                                             | <b>C67</b>                    | 0.9865             | Y                    | Y                 | None                | <b>STC</b>         |
|                                                       | <b>C68</b>                    | 0.9988             | Y                    | Y                 | CTx                 |                    |
|                                                       | <b>C69</b>                    | 0.9549             | Y                    | Y                 | CTx                 |                    |
|                                                       | <b>C70</b>                    | 0.9558             | Y                    | Y                 | CTx                 |                    |
| <b>32</b>                                             | <b>C57</b>                    | 0.9770             | Y                    | Y                 | CTx                 | <b>STC</b>         |
| <b>66</b>                                             | <b>C82</b>                    | 0.9816             | Y                    | Y                 | CTx                 | <b>BC</b>          |
|                                                       | <b>C83</b>                    | 0.9816             | Y                    | Y                 | CTx                 |                    |
|                                                       | <b>C84</b>                    | 0.9682             | Y                    | Y                 | CTx                 |                    |
| <b>18</b>                                             | <b>C36</b>                    | 0.9775             | Y                    | Y                 | CTx                 | <b>BC</b>          |
|                                                       | <b>C52</b>                    | 0.9677             | Y                    | Y                 | CTx                 |                    |
|                                                       | <b>C53</b>                    | 0.8981             | Y                    | Y                 | CTx                 |                    |
|                                                       | <b>C55</b>                    | 0.9677             | Y                    | Y                 | CTx                 |                    |
| <b>92</b>                                             | <b>C63</b>                    | 0.9928             | Y                    | Y                 | None                | <b>TPC</b>         |
| <b>53</b>                                             | <b>C73</b>                    | 0.9992             | Y                    | Y                 | None                | <b>BC</b>          |
|                                                       | <b>C74</b>                    | 0.8514             | Y                    | Y                 | None                |                    |
|                                                       | <b>C75</b>                    | 0.9354             | Y                    | Y                 | None                |                    |
|                                                       | <b>C76</b>                    | 0.8255             | Y                    | Y                 | CTx                 |                    |
| <b>5</b>                                              | <b>C77</b>                    | 0.9964             | Y                    | Y                 | CTx                 | <b>CC</b>          |

| <b>Sample number of the animal in the dendrogram*</b> | <b>Sample identification‡</b> | <b>Probability</b> | <b>Predict Class</b> | <b>True Class</b> | <b>Chemotherapy</b> | <b>Cancer Type</b> |
|-------------------------------------------------------|-------------------------------|--------------------|----------------------|-------------------|---------------------|--------------------|
| <b>80</b>                                             | <b>C28</b>                    | 0.9929             | Y                    | Y                 | None                | <b>BC</b>          |
| <b>95</b>                                             | <b>C79</b>                    | 0.9957             | Y                    | Y                 | None                | <b>BC</b>          |
| <b>39</b>                                             | <b>C56</b>                    | 0.9549             | Y                    | Y                 | CTx                 | <b>STC</b>         |
| <b>11</b>                                             | <b>C26</b>                    | 0.9937             | Y                    | Y                 | CTx                 | <b>STC</b>         |
| <b>87</b>                                             | <b>C51</b>                    | 0.9890             | Y                    | Y                 | CTx                 | <b>BC</b>          |
| <b>71</b>                                             | <b>C72</b>                    | 0.6680             | Y                    | Y                 | CTx                 | <b>TVT</b>         |
| <b>58</b>                                             | <b>C78</b>                    | 0.9732             | Y                    | Y                 | CTx                 | <b>BC</b>          |
| <b>91</b>                                             | <b>C62</b>                    | 0.9871             | Y                    | Y                 | CTx                 | <b>TVT</b>         |
| <b>27</b>                                             | <b>C59</b>                    | 0.9946             | Y                    | Y                 | None                | <b>TVT</b>         |
|                                                       | <b>C60</b>                    | 0.9770             | Y                    | Y                 | None                |                    |
|                                                       | <b>C61</b>                    | 0.9924             | Y                    | Y                 | CTx                 |                    |
| <b>45</b>                                             | <b>C64</b>                    | 0.9571             | Y                    | Y                 | None                | <b>BC</b>          |
|                                                       | <b>C65</b>                    | 0.9928             | Y                    | Y                 | CTx                 |                    |
|                                                       | <b>C66</b>                    | 0.9164             | Y                    | Y                 | CTx                 |                    |
| <b>63</b>                                             | <b>C81</b>                    | 1.0000             | Y                    | Y                 | CTx                 | <b>BC</b>          |

\*Sample number regarding the original number of the animal in the circular dendrogram (Figure 2 of the manuscript).

‡Codes for each sample collected during longitudinal evaluation.
